# Supplementary material
Source: PubMed Central journal article supplement (PMC2771592)
Supplement: mmc1.pdf [file mmc1.pdf]

Supplemental Data

Allele-Specific Chromatin Remodeling  
in the *ZBPB2/GSDMB/ORMDL3* Locus Associated  
with the Risk of Asthma and Autoimmune Disease

Dominique J. Verlaan, Soizik Berlivet, Gary M. Hunninghake, Anne-Marie Madore, Mathieu Larivière, Sanny Moussette, Elin Grundberg, Tony Kwan, Manon Ouimet, Bing Ge, Rose Hoberman, Marcin Swiatek, Joana Dias, Kevin C.L. Lam, Vonda Koka, Eef Harmsen, Manuel Soto-Quiros, Lydiana Avila, Juan C. Celedón, Scott T. Weiss, Ken Dewar, Daniel Sinnett, Catherine Laprise, Benjamin A. Raby, Tomi Pastinen, and Anna K. Naumova

**Figure S1.** Mendelian transmission of AE observed for *ZBPB2*, *ZBPB2-GSDMB* intergenic region and *ORMDL3* in the LCLs from CEPH family 1420. Relative underexpression (-) or overexpression (+) is shown below the family member when data was available. The estimated fold differences between alleles, measured with the Illumina 1M BeadChip AE analysis, are shown in the bar graph for each family member. The red color represents the haplotype associated with underexpression of *GSDMB* (rs12936231>G) while the blue color represents the overexpressed-associated haplotype (rs12936231>C).

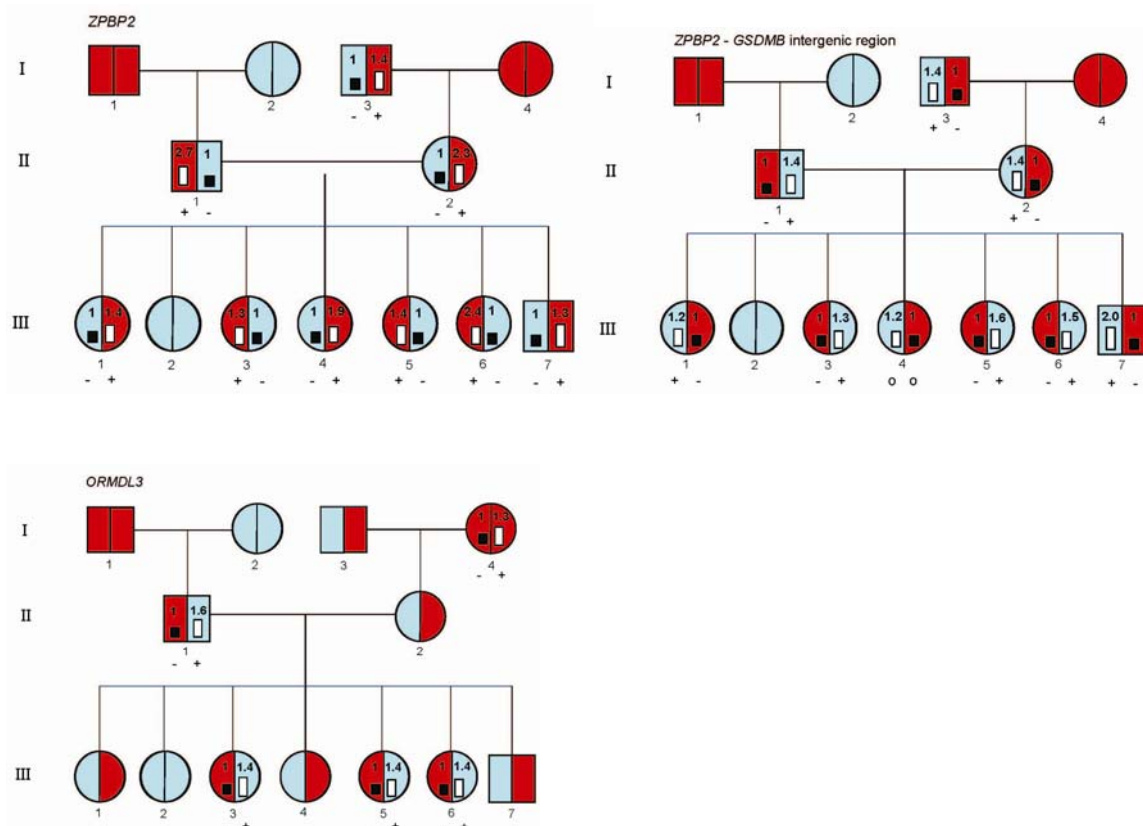

**Figure S2.** Analysis of chromatin states in LCLs. Number of LCLs analyzed in each experiment is given in parentheses. **A.** N-ChIP qPCR assay shows association of the rs12936231 C-allele with active and inactive chromatin marks. (n=5). **B.** As controls for N-ChIP assays, active and inactive histone modifications were evaluated by quantitative real-time PCR for the *NES* (active), *SNRPN* (imprinted) and *RPLP1* (inactive) genes (n=5). **C.** As controls for detection of allele-specific histone modifications in N-ChIP assays, enrichment of H3Ac and H3K9me3 at the imprinted *SNRPN* region were analyzed by PCR and sequencing. Allele-specific histone modifications are detected. **D.** Controls for X-ChIP assays. Active and inactive histone modifications were evaluated by quantitative real-time PCR at the *NES* and *SNRPN* genes (n=8). **E.** As controls for CTCF-specific X-ChIP assays, the *H19* (positive) and *SNRPN* (negative) regions were analyzed using quantitative real-time PCR at (n=8). As expected the *H19* region is CTCF-enriched, whereas the *SNRPN* region is not. The error bars represent standard deviation.

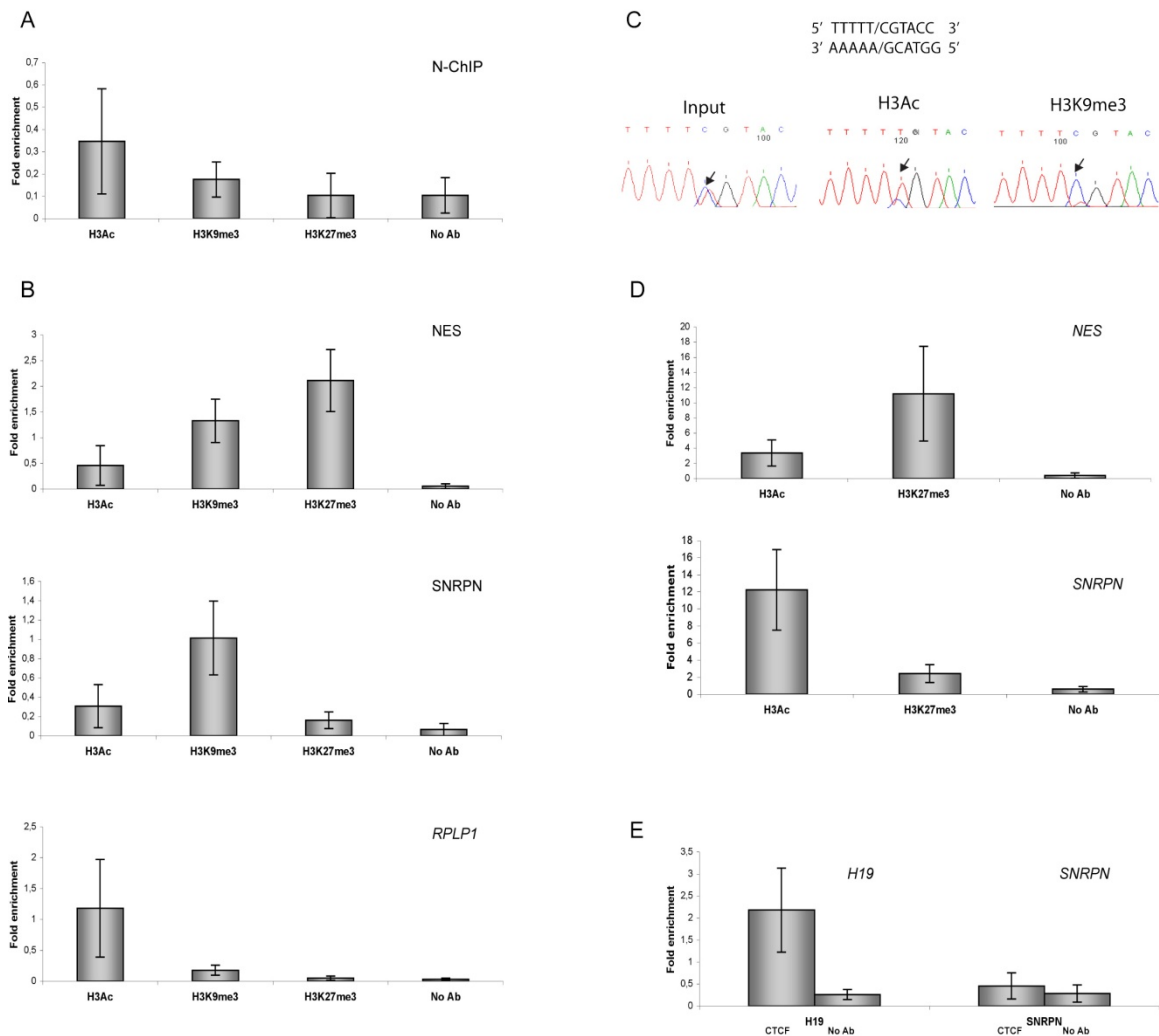

**Figure S3.** Overlapping polymorphic binding sites for CTCF and p300 in the rs12936231 region.

A) Comparison of the rs12936231 sequence (negative strand) to the consensus CTCF binding motif derived on the basis of genome-wide analysis of conserved sites (PMID: 17442748). The SNP is shown in red. Matching nucleotides are shown in gray boxes. The G-allele is closer to the consensus sequence the C-allele, however, none of them is a perfect match.

B) Comparison of the rs12936231 sequence (negative strand) to the consensus p300 binding motif. The SNP is shown in red. Matching nucleotides are shown in gray boxes.

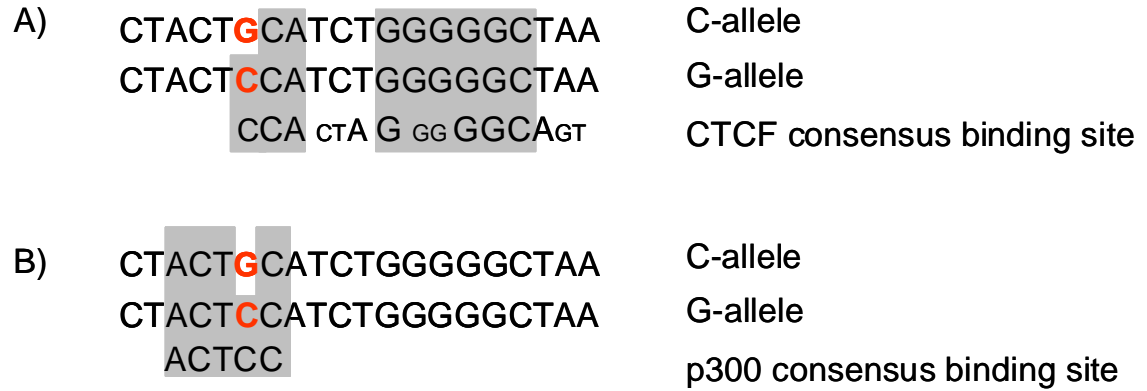

**Figure S4** ENCODE ChIP-seq showing LCL-specific CTCF-ChIP-seq. peak centered on the rs12936231 SNP, **A.** chromosomal location, **B.** RefSeq genes. ENCODE CTCF-ChIP-seq for: **C.** lymphoblastoid cell lines (LCL, GM12878, heterozygous at the rs12936231), **D.** Human Umbilical Vein Endothelial Cells (HUVEC), **E.** Human Myelogenous Leukaemia cells (K562) and **F.** Keratinocytes (Kera), **G.** Single Nucleotide Polymorphism (dbSNP build 129)

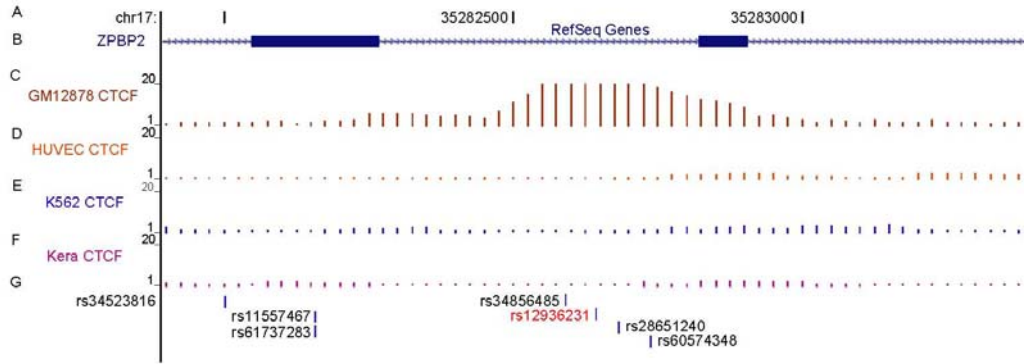

**Figure S5** Lack of genotype effect on FAIRE enrichment at the *ORMDL3* promoter. FAIRE enrichment was compared in samples from homozygous (n=3 for the G-allele, n=3 for the C-allele) and heterozygous (n=6) FAIRE-treated LCLs using real-time qPCR. An unlinked region was used for normalization. The error bars represent standard deviation.

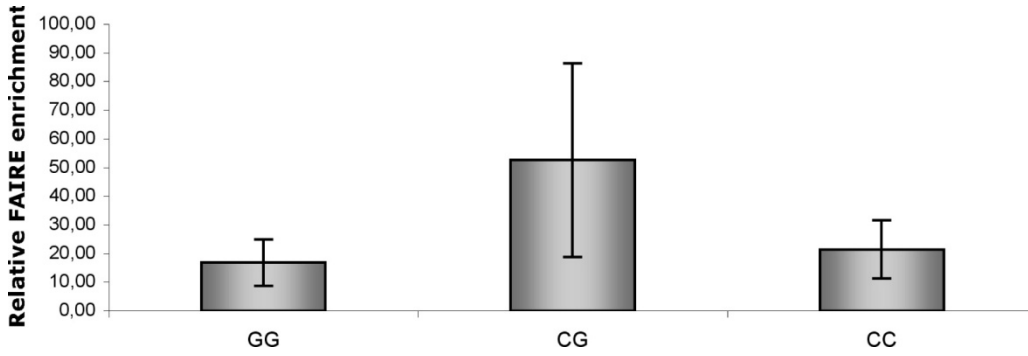

**Figure S6.** EMSA analyses showing allelic DNA-protein interactions for SNP (A) rs12936231, (B) rs7216389, (C) rs9303277 and (D) rs8067378 in HeLa, HEPG2, JEG-3, MG-63 and LCL. The unlabeled probes used to compete the DNA-protein interactions are indicated (+) at the top of each lane. Specific competitors corresponding to the unlabeled allele-specific probes were used in lanes 3, 4, 8 and 9 and a non-specific competitor was used in lanes 5 and 10.

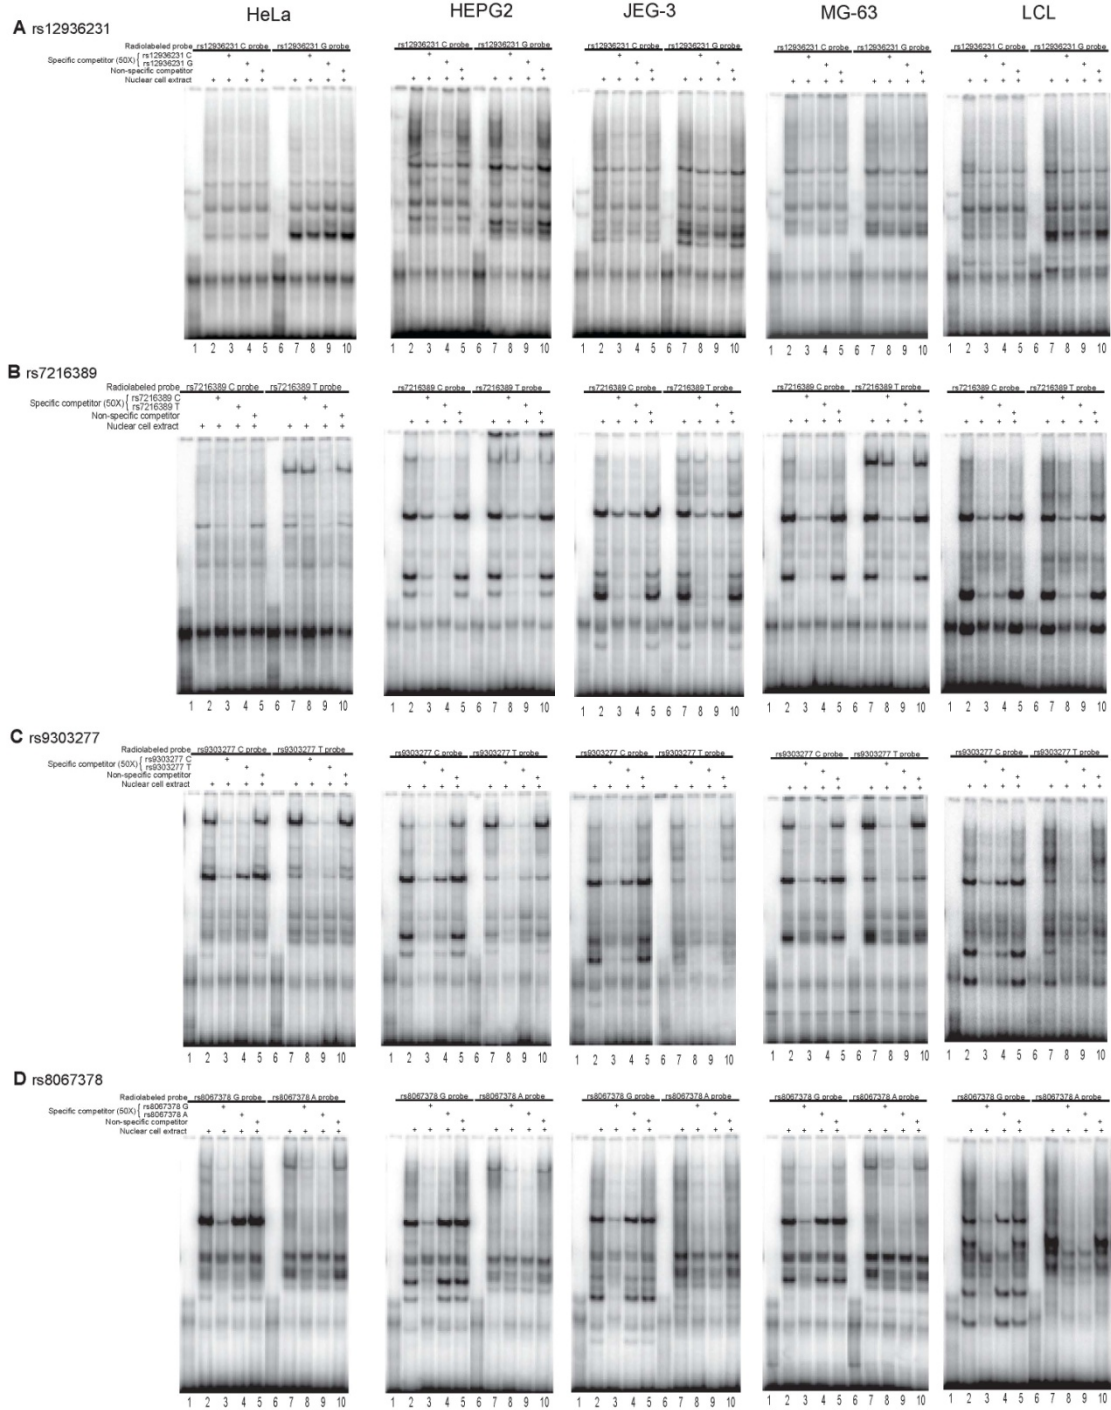

**Figure S7.** Linear regression analysis of rs2290400 genotypes (AA, AG, GG) and normalized expression scores (Illumina HumanRef8) for the *GSDMB* gene (probe ID: ILMN\_19619) in 95 human primary bone samples collected from orthopedic surgery. Age and sex of donor were included as covariates in the model, giving an overall P-value of 0.14. Expression scores for each individual are averaged from two biological replicates and shown in red and regression line is indicated with blue dashes.

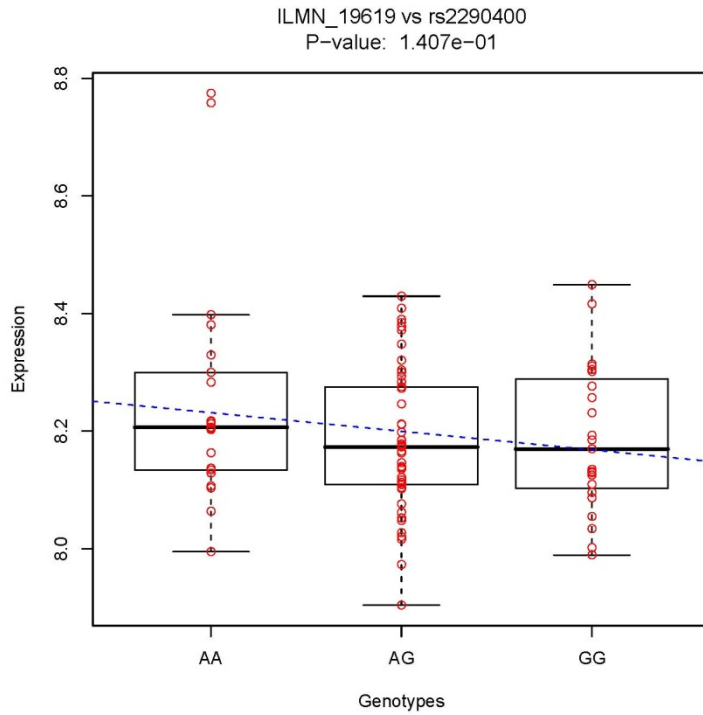

**Table S1.** List of primers used in functional assays

List of primers used in functional assays.

| <i>Genic Location</i> | <i>SNP</i> | <i>Chr</i> | <i>Position</i> | <i>Forward primer 5'-3'</i> | <i>Reverse primer 5'-3'</i> | <i>Assay</i>            |
|-----------------------|------------|------------|-----------------|-----------------------------|-----------------------------|-------------------------|
| <i>IKZF3</i>          | rs907091   | 17         | 35175268        | TTCTCTTTGTGGATTTGCAT        | TGTTTTCCCATCAGGGACTT        | FAIRE                   |
| <i>IKZF3</i>          | rs9303277  | 17         | 35229995        | CAAGAAGGCTGGAAGGAGAG        | GCTTTTCCTGACAATTCAGTCA      | FAIRE                   |
| <i>IKZF3</i>          | rs2060941  | 17         | 35236409        | TGCAATGGAACTTGGCATA         | CTCACCTCAAACACGCACAC        | FAIRE                   |
| <i>IKZF3</i>          | rs3816470  | 17         | 35239327        | CAAAACCGCTGCACTTTCTA        | CATCCCTTTTGGGTATGTGTG       | FAIRE                   |
| Intergenic            | rs4795397  | 17         | 35277271        | GCCAAGAAGGAACCATCAAA        | CCCAGTGCAAACGTATCTA         | FAIRE                   |
| <i>ZBP2</i>           | rs12150079 | 17         | 35278943        | CCCAACCAAATTGTAGGAC         | GACAGAACGATGGTATGCTT        | FAIRE                   |
| <i>ZBP2</i>           | rs11557467 | 17         | 35282160        | TTTTAAAGCCTATCGGGAACC       | GAGGCCATGTTCTGGAATTT        | FAIRE                   |
| <i>ZBP2</i>           | rs12936231 | 17         | 35282646        | CTTACATTAGCCCCAGATG         | TGCAGGCACATGTTTAGTCC        | FAIRE/N-ChIP/X-ChIP     |
| Intergenic            | rs9901146  | 17         | 35296869        | CCCTTCCATCTTTGTTTCCA        | GCAGCAAGATCCTGTCTCAA        | FAIRE                   |
| Intergenic            | rs12950743 | 17         | 35302759        | GGCTATGAGGGAGACAGCAC        | CCACTCCCCATCACCTAGAA        | FAIRE                   |
| Intergenic            | rs7359623  | 17         | 35303115        | AGCATTATGAGCAGGGAAGG        | TCAAAATGAGATGTGCTATTATGGA   | FAIRE                   |
| Intergenic            | rs8067378  | 17         | 35304874        | TCCCTCAGAAAGAAGAGCACA       | TCCACTCTAGGCCACTGACA        | FAIRE                   |
| <i>GSDMB</i>          | rs2290400  | 17         | 35319766        | CAGCTTCCTGGAGAGAGTGG        | GGTGTGTGTTTCCTTGGTTT        | FAIRE                   |
| <i>GSDMB</i>          | rs1008723  | 17         | 35319793        | CAGCTTCCTGGAGAGAGTGG        | GGTGTGTGTTTCCTTGGTTT        | FAIRE                   |
| <i>GSDMB</i>          | rs1011082  | 17         | 35322040        | GCTCATGAAAAGCAGGGA          | TGGCTACCCTTGAAAAACAGG       | FAIRE                   |
| <i>GSDMB</i>          | rs7216389  | 17         | 35323475        | AGGCAACCCTGGAAAGTCA         | CTGGGAGGTTGGAGACAAAG        | FAIRE                   |
| <i>GSDMB</i>          | rs7216558  | 17         | 35323597        | AGGTTCGTGGAGGATGTGTG        | CCACCAGTTCCAAAATGGAT        | FAIRE                   |
| <i>GSDMB</i>          | rs9303281  | 17         | 35327572        | TGATAATGCCACCACCCTT         | TAAGGCAGGCAAATCATTCC        | FAIRE                   |
| <i>GSDMB</i>          | rs7219923  | 17         | 35328044        | TCCCTTGGCTCTGATTCTTG        | GGTAGGATGGGGAAGTGGAT        | FAIRE                   |
| Intergenic            | rs7224129  | 17         | 35328952        | GAGTGTGGGCCAGACAATG         | GCTGGTTCTGCTGGGTTATG        | FAIRE                   |
| ORMDL3                | rs4378650  | 17         | 35334391        | CAGAGAAGTCAAGGCCCATC        | CCTCACTTCCTTCCCTCCT         | FAIRE                   |
| ORMDL3                | rs1260333  | 17         | 35336333        | CACCAGAGACCCCTGAAAAA        | CGGCTCAACTCCTGTAGACC        | FAIRE                   |
| ORMDL3 promoter       | -          | -          | -               | GTTACGCACAAAATTCTATCATCC    | TTTTTCCTGGGCTCCGTTT         | FAIRE (unlinked region) |
| Intergenic            | -          | -          | -               | TTGCTATTCTGCTGGCTTCA        | GAAAGCTTTGGTCTGGGAAA        | FAIRE (unlinked region) |
| <i>SNRPN</i>          | rs200230   | 15         | 22750861        | GGGTAGAAAAATCGCACCAA        | CCTCACCCCTCAGGTCTTCC        | N-ChIP/X-ChIP           |
| <i>NES</i>            | -          | 1          | -               | TCAGAAAGCCACCACCATCA        | GCTGGAGAGTGGAACCAAAGAA      | N-ChIP/X-ChIP           |
| <i>RPLP1</i>          | -          | 15         | -               | CTAACCAGGAGATTACGAACAATGTC  | GGTCCATGAGTTGCTTGACTTG      | N-ChIP/X-ChIP           |
| <i>H19</i>            | -          | 11         | -               | AGACCTGGGACGTTTCTGTG        | AGAATCGGCTGTACGTGTGG        | X-ChIP                  |
| <i>IKZF3</i>          | -          | 17         | -               | TGAAAAATGTGGACAGTGGA        | CATTTCCCATGGGTTCTGAC        | qRT-PCR                 |
| <i>ZBP2</i>           | -          | 17         | -               | CTGGACAGCTGATGGTGA          | CCCGATAGGCAAAGACCATA        | qRT-PCR                 |
| <i>GSDMB</i>          | -          | 17         | -               | ACATGGAGGACCCAGACAAG        | CACAGAGAATTCGTGCCTCA        | qRT-PCR                 |



| <i>ORMDL3</i>         | -                      | 17         | -               | GTGGCATCTGGCTCTCCTAC                       | TCACCGTGTGCAGGAAGATA | qRT-PCR      |
|-----------------------|------------------------|------------|-----------------|--------------------------------------------|----------------------|--------------|
| <i>RPS18</i>          | -                      | 6          | -               | TGTGGTGTGAGGAAAGCAG                        | GGACCTGGCTGTATTTTCCA | qRT-PCR      |
| <i>ORMDL3</i>         | rs12603332             | 17         | 35336333        | GGCCCGGATATTGTATGTG                        | CCCTACCCTAGATGGGGAGA | AE           |
| <i>ORMDL3</i>         | rs8076131              | 17         | 35334438        | GGTTTGGGGAGATCCAGAAT                       | CAGAGAAGTCAAGGCCCATC | AE           |
| <i>GSDMB</i>          | rs1008723              | 17         | 35319793        | TTTGTACCCACCCCTACCT                        | AAGGATCTCAGGGCCTTACC | AE           |
| <i>GSDMB</i>          | rs7216389              | 17         | 35323475        | CTGCCTCCAAAACCTAGCAG                       | GCAGTTCTGTCGCTGTTGTT | AE           |
| <i>GSDMB</i>          | rs7219923              | 17         | 35328044        | AGGAACCAGGGAGGAATGAC                       | AGGAGGAAGCAGTGAGTGGA | AE           |
| <i>Genic Location</i> | <i>SNP</i>             | <i>Chr</i> | <i>Position</i> | <i>EMSA PROBES</i>                         |                      | <i>Assay</i> |
| <i>IKZF3</i>          | rs9303277              | 17         |                 | GTCATGCGATGAATTA AAAA(C/T)AGGGCTGTGTTAAAAT |                      | EMSA         |
| <i>ZBP2</i>           | rs12936231             | 17         |                 | CATTAGCCCCCAGATG(C/G)AGTGAAACCATCAAGTA     |                      | EMSA         |
| Intergenic            | rs8067378              | 17         |                 | TATTTGTAACGTTATAAAAT(A/G)GGGAAAAACGTTTATAT |                      | EMSA         |
| <i>GSDMB</i>          | rs7216389              | 17         |                 | TGGAAAGTCACAAAACA(C/T)GCATGGACTCGGCCCTGA   |                      | EMSA         |
| Intergenic            | rs4795397              | 17         |                 | TCCATCCCTACAGAAAAGGCCA(A/G)TCGGGCTCCATCC   |                      | EMSA         |
|                       | Non-specific DNA probe |            |                 | GATCGAACTGACCGCTTGC GGCCCGT                |                      | EMSA         |

















|         |            |          |                                                                                                                     |       |
|---------|------------|----------|---------------------------------------------------------------------------------------------------------------------|-------|
| 0.09939 | rs3744806  | 35605152 | G C G C C G C G C C C C C G C C C C C C C C C C C G C C C C G C G C G G C C C C C C C G C G G G G C C C C C G G     | CCGCG |
| 0.42577 | rs9907683  | 35612427 | A A A A A A A C A A A A A A A A A A A A A A A A A A A A A A C A C A A A A A A A A A C C A A A A A A A A A           | AAAAC |
| 0.09939 | rs8073925  | 35613046 | C G C G G C G C G G G G G G G G G G G G G G G G G G C G G G G C G C G C C G G G G G G G G C C G C C C G G G G G C C | GGCGC |
| 1       | rs11867995 | 35627657 | G G G G G G G G G G G G T G G G G G G G G G G G G G G G G G G G G G G G G G G G G G G G G G G G G G G G G G         | GGGGG |
| 1       | rs11871303 | 35628133 | T T T T T T T T T T T T G T T T T T T T T T T T T T T T T T T T T T T T T T T T T T T T T T T T T T T T T T         | TTTTT |
| 0.67187 | rs9901109  | 35633374 | T T T T T T T G T T T T T T T T T T T T T T T T T T T T T T T T T T T T T T T T T T T T T T T T T T T T T T         | TTTTG |
| 0.70785 | rs6503539  | 35636451 | C C T C C C C T C C C C C C C C C C C C C C C C C C C C C C C C C C C C C C C C C C C C C C C C C C C C C C         | CCCCT |
| 0.70785 | rs9908034  | 35640001 | T T C T T T T C T T T T T T T T T T T T T T T T T T T T T T T T T T T T T T T T T T T T T T T T T T T T T T T       | TTTTC |
| 0.67187 | rs16965687 | 35641044 | T T T T T T T C T T T T T T T T T T T T T T T T T T T T T T T T T T T T T T T T T T T T T T T T T T T T T T T       | TTTTC |
| 1       | rs9916782  | 35641566 | A A A A A A A G A A A A A A A A A A A A A A A A A A A A A A A A A A A A A G A A A A A A A A A A A A A A A A A       | AAAAG |
| 0.67187 | rs8066144  | 35641717 | T T T T T T T C T T T T T T T T T T T T T T T T T T T T T T T T T T T T T T T T T T T T T T T T T T T T T T T       | TTTTC |
| 0.70785 | rs9904021  | 35652756 | G G T G G G G T G G G G G G G T G G G G G G G G G G G G G G G T G G G T G G G G G G G G G G T T G G G G G G G G G   | GGGGT |
| 0.67187 | rs9893520  | 35654671 | C C C C C C C T C C C C C C C T C C C C C C C C C C C C C C C C C C C C C C C C C C T T C C C C C C C C C C C C     | CCCCT |
| 0.67187 | rs11078940 | 35663590 | C C C C C C C T C C C C C C C T C C C C C C C C C C C C C C C C C C C C C C C C C C T T C C C C C C C C C C C C     | CCCCT |
| 1       | rs17679361 | 35666068 | T T C T T T T T T T T T T T T T T T T T T T T T T T T T T T T T T T T T T T T T T T T T T T T T T T T T T T T T     | TTTTT |
| 0.47412 | rs4566234  | 35667875 | G G T G G G G T G G G G G G T G G G G G G G G G G G G G G G G G G G T G G G T G G G G G T G G G T G T G G G G G G   | GGGGT |
| 0.70785 | rs4077125  | 35677005 | G G A G G G G A G G G G G A G G G G G G G G G G G G G G G G A G G G A G G G G G G G G G A G A G G G G G G G G       | GGGGA |
| 0.67187 | rs9916460  | 35681591 | T T T T T T T C T T T T T C T T T T T T T T T T T T T T T T T T T T T T T T T T T T T T T T T T T T T T T T T       | TTTTC |
| 0.67187 | rs9908257  | 35681648 | G G G G G G G A G G G G G A G G G G G G G G G G G G G G G G G G G G G A G G G G G G G G G A G A G G G G G G G       | GGGGA |
| 1       | rs9892946  | 35685801 | T T T T T T T C T T T T T C C T T T T T T T T T T T T T T T T T T T T T T T T T T T T T T T T T T T T T T T T       | TTTTC |
| 1       | rs4134998  | 35698971 | T T C T T T T T T T T T T T T T T T T T T T T T T T T T T T T T T T T T T T T T T T T T T T T T T T T T T T T T     | TTTTT |
| 0.49206 | rs4134999  | 35699133 | T T T T T T T T T T T T T T T T T T T T T T T T T T T T T T T T T T T T T T T T T T T T T T T T T T T T T T T       | TGTTT |
| 0.70785 | rs2077464  | 35700090 | A A G A A A A G A A A A A A G A A A A A A A A A A A A A A A A A A A A A A G A A A G A A A A A A A A A A A A A A     | AAAAG |
| 1       | rs4135001  | 35700228 | A A A A A A A A A A A A A A A A A A A A A A A A A A A A A A A A A A A A A A A A A A A A A A A A A A A A A A         | AAAAA |
| 1       | rs4135010  | 35703285 | A A A A A A A A A A A A A A A A A A A A A A A A A A A A A A A A A A A A A A A A A A A A A A A A A A A A A A         | AAAAA |
| 1       | rs4135012  | 35703774 | G G A G G G G G G G G G G G G G G G G G G G G G G G G G G G G G G G G G G G G G G G G G G G G G G G G G G           | GGGGG |
| 1       | rs4135018  | 35705761 | T T T T T T T T T T T T T T T T C T T T T T T T T T T T T T T T T T T T T T T T T T T T T T T T T T T T T T T       | TTTTT |
| 1       | rs4135019  | 35705816 | T T C T T T T T T T T T T T T T T T T T T T T T T T T T T T T T T T T T T T T T T T T T T T T T T T T T T T T T     | TTTTT |
| 1       | rs4135021  | 35706860 | G G A G G G G G G G G G G G G G G G G G G G G G G G G G G G G G G G G G G G G G G G G G G G G G G G G G G           | GGGGG |
| 1       | rs4135027  | 35709206 | C C A C C C C C C C C C C C C C C C C C C C C C C C C C C C C C C C C C C C C C C C C C C C C C C C C C C C         | CCCCC |
| 0.67187 | rs13706    | 35710677 | G G G G G G G A G G G G G A G G G G G G G G G G G G G G G G G G G G G G G G G G G A G G G G G G G G G G G G         | GGGGA |
| 1       | rs4135029  | 35710869 | G G G G G G G G G G G G G G G G G G G G G G G G G G G G G G G G G G G G G G G G G G G G G G G T G G G G G G G G     | GGGGG |
| 1       | rs4135030  | 35711074 | A A G A A A A A A A A A A A A A A A A A A A A A A A A A A A A A A A A A A G A A A A A A A A A A A A A A A A A       | AAAAA |
| 1       | rs2120200  | 35713901 | A A A A A A A G A A A A A G A A A A A A A A A A A A A A A A A A A A A A A G A A A A A A A A A A A A A A A A         | AAAAG |
| 1       | rs2957325  | 35715569 | C C C C C C C C C C C C C C C C T T C C C C C C C C C C C C C C C C C C C C C C C C C C C C C C C C C C C C         | CCCCC |
| 0.47412 | rs7217852  | 35723547 | A A G A A A A G A A A A A G A A A A A A A A A A A A A A A A A A A A A A A G A A A G A A A A A G A A A G A G A A A A | AAAAG |

























**Table S5.** *ORMDL3* allelic expression data for YRI LCLs

Table includes Fisher's Exact test P-values for each SNP. The haplotype associated with overexpression of *ORMDL3* can be found in green

| P value | snp        | YRI LCLs #<br>AE<br>phenotype<br>location | NA18502.c2 | NA18504.c2 | NA18517.c2 | NA18856.c2 | NA18858.c2 | NA18871.c2 | NA18912.c1 | NA19159.c2 | NA19207.c1 | NA19239.c2 | NA18502.c1 | NA18504.c1 | NA18517.c1 | NA18856.c1 | NA18858.c1 | NA18871.c1 | NA18912.c2 | NA19159.c1 | NA19207.c2 | NA19239.c1 |
|---------|------------|-------------------------------------------|------------|------------|------------|------------|------------|------------|------------|------------|------------|------------|------------|------------|------------|------------|------------|------------|------------|------------|------------|------------|
|         |            |                                           | -          | -          | -          | -          | -          | -          | -          | -          | -          | -          | -          | +          | +          | +          | +          | +          | +          | +          | +          | +          |
| 0.474   | rs11658678 | 34933622                                  | C          | C          | C          | C          | C          | C          | C          | C          | C          | C          | C          | C          | C          | C          | C          | C          | T          | C          | T          |            |
| 0.211   | rs8065963  | 34934858                                  | C          | C          | C          | C          | C          | C          | C          | C          | C          | C          | C          | C          | T          | C          | C          | C          | C          | T          | C          | T          |
| 0.628   | rs4404103  | 34936183                                  | A          | G          | G          | A          | G          | G          | A          | A          | A          | A          | A          | A          | A          | A          | A          | G          | A          | A          | A          | A          |
| 0.303   | rs7226073  | 34938026                                  | A          | T          | T          | A          | T          | T          | A          | A          | A          | A          | A          | A          | A          | A          | T          | A          | A          | A          | A          | A          |
| 1.000   | rs8069074  | 34938927                                  | A          | G          | G          | G          | G          | G          | G          | G          | A          | G          | G          | G          | G          | A          | A          | G          | A          | G          | G          | G          |
| 0.211   | rs12450559 | 34948235                                  | G          | G          | G          | G          | G          | G          | G          | G          | G          | G          | G          | A          | G          | G          | G          | G          | A          | G          | A          | A          |
| 0.656   | rs4239222  | 34949761                                  | G          | G          | G          | T          | G          | G          | T          | T          | G          | T          | T          | T          | G          | G          | G          | G          | T          | T          | T          |            |
| 0.211   | rs7503069  | 34950654                                  | C          | C          | C          | C          | C          | C          | C          | C          | C          | C          | C          | C          | G          | C          | C          | C          | C          | G          | C          | G          |
| 1.000   | rs11657058 | 34952904                                  | T          | G          | G          | G          | G          | G          | G          | T          | G          | G          | G          | G          | T          | T          | G          | T          | G          | G          | G          |            |
| 1.000   | rs11657153 | 34953255                                  | A          | G          | A          | G          | G          | G          | G          | A          | G          | G          | G          | G          | A          | A          | G          | A          | G          | G          | G          |            |
| 0.211   | rs11654018 | 34957266                                  | T          | T          | T          | T          | T          | T          | T          | T          | T          | T          | T          | C          | T          | T          | T          | T          | C          | T          | C          |            |
| 0.474   | rs2303316  | 34957743                                  | A          | A          | A          | A          | A          | A          | A          | A          | A          | A          | A          | A          | A          | A          | A          | A          | A          | G          | A          | G          |
| 1.000   | rs12947506 | 34961118                                  | T          | C          | C          | C          | C          | C          | C          | T          | C          | C          | C          | C          | T          | T          | C          | T          | C          | C          | C          |            |
| 1.000   | rs7503377  | 34962367                                  | T          | C          | C          | C          | C          | C          | C          | C          | C          | C          | C          | C          | T          | C          | C          | C          | C          | C          | C          |            |
| 0.474   | rs7216086  | 34962948                                  | G          | G          | G          | G          | G          | G          | G          | G          | G          | G          | G          | G          | G          | G          | G          | G          | A          | G          | A          |            |
| 0.303   | rs9972899  | 34965091                                  | C          | T          | T          | C          | T          | T          | C          | C          | C          | C          | C          | C          | C          | C          | T          | C          | C          | C          | C          |            |
| 0.211   | rs11078915 | 34968952                                  | T          | T          | T          | T          | T          | T          | T          | T          | T          | T          | T          | C          | T          | T          | T          | T          | C          | T          | C          |            |
| 1.000   | rs6503521  | 34969077                                  | G          | T          | T          | T          | T          | T          | T          | T          | T          | T          | T          | T          | T          | T          | T          | T          | T          | T          | T          |            |
| 0.211   | rs12938115 | 34969252                                  | C          | C          | C          | T          | C          | C          | T          | T          | C          | C          | C          | C          | C          | C          | C          | C          | C          | C          | C          |            |
| 0.656   | rs4795384  | 34970297                                  | C          | C          | C          | G          | C          | C          | G          | C          | G          | G          | G          | G          | C          | C          | C          | C          | G          | G          | G          |            |
| 1.000   | rs4488484  | 34970903                                  | T          | A          | A          | A          | A          | A          | A          | T          | A          | A          | A          | A          | T          | T          | A          | T          | A          | A          | A          |            |
| 1.000   | rs12944298 | 34973799                                  | C          | C          | C          | T          | C          | C          | T          | T          | C          | T          | T          | C          | C          | C          | C          | C          | C          | T          | C          |            |
| 1.000   | rs7503195  | 34976041                                  | G          | G          | G          | G          | G          | G          | G          | G          | G          | G          | G          | G          | G          | G          | G          | G          | G          | G          | G          |            |
| 1.000   | rs8081144  | 34976817                                  | G          | G          | G          | A          | G          | G          | A          | A          | G          | A          | A          | A          | G          | G          | G          | G          | G          | A          | G          |            |
| 1.000   | rs903507   | 34979949                                  | T          | C          | C          | C          | C          | C          | C          | T          | C          | C          | C          | C          | T          | T          | C          | T          | C          | C          | C          |            |
| 0.656   | rs8075737  | 34980842                                  | T          | T          | T          | C          | T          | T          | C          | C          | T          | C          | C          | C          | T          | T          | T          | T          | C          | C          | C          |            |
| 1.000   | rs7224759  | 34981719                                  | A          | A          | A          | A          | A          | A          | A          | A          | A          | A          | A          | A          | A          | A          | A          | A          | A          | A          | A          |            |
| 1.000   | rs1874226  | 34982557                                  | T          | C          | C          | C          | C          | C          | C          | T          | C          | C          | C          | C          | T          | T          | C          | T          | C          | C          | C          |            |
| 1.000   | rs4795385  | 34986674                                  | G          | A          | A          | A          | A          | A          | A          | G          | A          | A          | A          | A          | G          | G          | A          | G          | A          | A          | A          |            |
| 1.000   | rs11657812 | 34987853                                  | C          | C          | C          | C          | C          | C          | C          | C          | C          | C          | C          | C          | C          | C          | C          | C          | C          | C          | C          |            |
| 0.211   | rs1619021  | 34992800                                  | G          | G          | G          | G          | G          | G          | G          | G          | G          | G          | G          | A          | G          | G          | G          | G          | A          | G          | A          |            |
| 1.000   | rs1877030  | 34993687                                  | T          | C          | C          | C          | C          | C          | C          | C          | C          | C          | C          | C          | T          | C          | C          | C          | C          | C          | C          |            |
| 1.000   | rs12453198 | 34995405                                  | T          | T          | C          | C          | C          | C          | C          | C          | C          | C          | C          | C          | T          | C          | C          | C          | C          | T          | C          |            |
| 1.000   | rs11654954 | 34999505                                  | A          | A          | G          | G          | G          | G          | G          | G          | G          | G          | G          | G          | A          | G          | G          | G          | G          | A          | G          |            |
| 1.000   | rs998480   | 35009251                                  | T          | T          | A          | T          | A          | A          | T          | T          | A          | T          | T          | T          | T          | A          | A          | A          | T          | T          | T          |            |
| 0.474   | rs9916503  | 35011091                                  | T          | T          | T          | T          | T          | T          | T          | T          | T          | T          | T          | T          | A          | T          | T          | T          | T          | A          | T          |            |
| 0.628   | rs9889354  | 35011493                                  | A          | A          | G          | G          | G          | G          | G          | G          | G          | G          | G          | G          | A          | G          | G          | G          | A          | A          | A          |            |
| 1.000   | rs12453682 | 35023531                                  | C          | C          | T          | C          | C          | C          | C          | C          | C          | C          | C          | C          | C          | C          | C          | C          | T          | C          | T          |            |
| 1.000   | rs12946926 | 35023628                                  | G          | G          | G          | G          | G          | G          | G          | G          | G          | G          | G          | G          | G          | G          | G          | G          | G          | G          | G          |            |
| 1.000   | rs9915323  | 35024007                                  | A          | A          | T          | A          | A          | A          | T          | T          | A          | A          | A          | A          | A          | A          | A          | A          | T          | A          | T          |            |
| 0.628   | rs1877032  | 35024590                                  | T          | T          | T          | C          | C          | C          | T          | T          | T          | C          | C          | C          | T          | T          | T          | T          | T          | T          | T          |            |
| 1.000   | rs1874228  | 35028800                                  | A          | A          | G          | A          | A          | A          | A          | A          | A          | A          | A          | A          | A          | A          | A          | A          | A          | G          | A          | G          |
| 0.370   | rs879606   | 35035375                                  | A          | A          | G          | G          | G          | G          | G          | A          | G          | G          | G          | A          | A          | A          | A          | A          | A          | A          | G          |            |
| 1.000   | rs2271309  | 35038516                                  | G          | G          | A          | G          | G          | G          | G          | G          | G          | G          | G          | G          | G          | G          | G          | G          | A          | G          | A          |            |
| 1.000   | rs907094   | 35043897                                  | G          | G          | A          | G          | G          | G          | G          | G          | G          | G          | G          | G          | G          | G          | G          | G          | A          | G          | A          |            |
| 1.000   | rs3764352  | 35044465                                  | C          | C          | T          | C          | C          | C          | C          | C          | C          | C          | C          | C          | C          | C          | C          | C          | T          | C          | T          |            |
| 0.474   | rs9532     | 35046139                                  | G          | A          | G          | G          | G          | G          | G          | G          | A          | G          | G          | G          | G          | G          | G          | G          | G          | G          | G          |            |
| 0.170   | rs1874224  | 35049186                                  | T          | T          | T          | G          | G          | G          | G          | T          | G          | G          | G          | T          | T          | T          | T          | T          | T          | T          | T          |            |
| 1.000   | rs9913626  | 35051252                                  | C          | C          | C          | C          | C          | C          | C          | C          | C          | C          | C          | C          | C          | C          | C          | C          | C          | C          | C          |            |
| 0.628   | rs12937003 | 35054941                                  | T          | T          | T          | C          | C          | C          | T          | T          | T          | C          | C          | C          | T          | T          | T          | T          | T          | T          | T          |            |
| 0.170   | rs9892427  | 35058384                                  | T          | T          | T          | C          | C          | C          | C          | T          | C          | C          | C          | T          | T          | T          | T          | T          | T          | T          | T          |            |
| 0.370   | rs9972882  | 35061224                                  | A          | A          | C          | C          | C          | C          | C          | A          | C          | C          | C          | A          | A          | A          | A          | A          | C          | A          | C          |            |
| 1.000   | rs881844   | 35063744                                  | C          | C          | G          | C          | C          | C          | C          | C          | C          | C          | C          | C          | C          | C          | C          | C          | G          | C          | G          |            |
| 1.000   | rs11869286 | 35067382                                  | G          | G          | C          | G          | G          | G          | G          | G          | G          | G          | G          | G          | G          | G          | G          | G          | C          | G          | C          |            |

|       |            |          |   |   |   |   |   |   |   |   |   |   |   |   |   |   |   |   |   |   |   |   |
|-------|------------|----------|---|---|---|---|---|---|---|---|---|---|---|---|---|---|---|---|---|---|---|---|
| 1.000 | rs1877031  | 35067606 | G | G | A | G | G | G | G | G | G | G | G | G | G | G | G | A | G | A |   |   |
| 0.370 | rs2271308  | 35071008 | T | T | C | C | C | C | C | T | C | C | C | T | T | T | T | C | T | C |   |   |
| 1.000 | rs931992   | 35074961 | G | G | T | G | G | G | G | G | G | G | G | G | G | G | G | T | G | T |   |   |
| 0.370 | rs1053651  | 35075837 | A | A | C | C | C | C | C | A | C | C | C | A | A | A | A | C | A | C |   |   |
| 0.370 | rs876493   | 35078071 | G | G | A | A | A | A | A | A | G | G | G | A | G | G | G | A | G | A |   |   |
| 1.000 | rs14050    | 35081598 | C | C | T | T | T | T | C | C | C | C | C | T | C | C | C | T | C | T |   |   |
| 0.370 | rs2952151  | 35082022 | T | T | C | C | C | C | C | T | T | T | C | T | T | T | T | C | T | C |   |   |
| 0.370 | rs2941503  | 35082271 | A | A | G | G | G | G | G | A | A | A | G | A | A | A | A | A | G | A | G |   |
| 1.000 | rs907087   | 35082313 | G | G | A | A | A | A | A | G | A | A | A | A | G | A | G | G | A | G | A |   |
| 1.000 | rs903502   | 35083130 | C | C | T | C | C | C | C | C | T | T | C | C | C | C | C | T | C | T |   |   |
| 0.370 | rs2941504  | 35084426 | A | A | G | G | G | G | G | A | G | G | G | A | A | A | A | A | G | A | G |   |
| 1.000 | rs1565922  | 35084561 | A | A | G | G | G | G | A | A | G | G | G | A | A | A | A | A | G | A | G |   |
| 1.000 | rs2934953  | 35085841 | T | T | A | A | A | A | T | T | T | A | A | A | T | T | T | T | A | T | A |   |
| 1.000 | rs2934952  | 35085892 | G | G | A | A | A | A | G | G | G | A | A | A | G | G | G | G | A | G | A |   |
| 1.000 | rs2941505  | 35086230 | A | A | G | G | G | G | A | A | A | G | G | G | A | A | A | A | G | A | G |   |
| 1.000 | rs2941506  | 35086561 | A | A | G | G | G | G | A | A | A | G | G | G | A | A | A | A | A | G | A | G |
| 1.000 | rs907089   | 35087126 | G | G | A | A | A | A | G | G | G | A | A | A | G | G | G | G | A | G | A |   |
| 1.000 | rs2313171  | 35087368 | T | T | C | C | C | C | T | T | T | C | C | C | T | T | T | T | C | T | C |   |
| 1.000 | rs12150298 | 35088067 | T | T | C | C | C | C | T | T | T | C | C | C | T | T | T | T | C | T | C |   |
| 1.000 | rs8078228  | 35088524 | C | C | T | T | T | T | C | C | C | T | T | T | C | C | C | C | T | C | T |   |
| 1.000 | rs11078919 | 35089281 | T | T | C | C | C | C | T | T | T | C | C | C | T | T | T | T | C | T | C |   |
| 1.000 | rs1476278  | 35089769 | C | C | T | C | C | C | C | C | C | C | C | C | C | C | C | C | T | C | T |   |
| 1.000 | rs9303274  | 35089879 | T | T | C | T | T | T | T | T | T | T | T | T | T | T | T | T | C | T | C |   |
| 1.000 | rs2517957  | 35092242 | G | G | A | G | G | G | G | G | G | G | G | G | G | G | G | G | A | G | A |   |
| 1.000 | rs2517958  | 35092277 | G | G | A | G | G | G | G | G | G | G | G | G | G | G | G | G | A | G | A |   |
| 0.370 | rs903501   | 35093019 | T | T | C | C | C | C | C | T | C | C | C | T | T | T | T | T | C | T | C |   |
| 1.000 | rs9892376  | 35094965 | C | C | C | C | C | C | C | C | C | C | C | C | C | C | C | C | C | C | C |   |
| 0.370 | rs2517954  | 35097076 | T | T | C | C | C | C | C | T | C | C | C | T | T | T | T | T | C | T | C |   |
| 1.000 | rs2517955  | 35097207 | C | C | T | C | C | C | C | C | C | C | C | C | C | C | C | C | T | C | T |   |
| 0.370 | rs2517956  | 35097385 | G | G | A | A | A | A | A | A | A | A | A | G | G | G | G | G | A | G | A |   |
| 1.000 | rs4252600  | 35110508 | G | G | G | G | G | G | G | G | C | C | G | G | G | G | G | G | G | G | G |   |
| 0.650 | rs2952155  | 35115244 | T | T | C | C | C | C | C | T | C | C | C | C | T | T | T | T | C | T | C |   |
| 1.000 | rs4252612  | 35117234 | C | C | C | C | C | C | C | C | C | C | C | C | C | C | C | C | C | C | C |   |
| 0.650 | rs1810132  | 35119531 | C | C | T | T | T | T | T | C | T | T | T | T | C | C | C | C | T | C | T |   |
| 1.000 | rs4252632  | 35125531 | G | G | G | G | G | G | G | G | T | T | G | G | G | G | G | G | G | G | G |   |
| 1.000 | rs4252643  | 35130293 | A | A | A | A | A | A | A | A | G | G | A | A | A | A | A | A | A | A | A |   |
| 1.000 | rs2952156  | 35130361 | A | A | A | G | G | G | G | A | G | G | G | G | A | A | A | A | G | A | G |   |
| 1.000 | rs4252658  | 35137889 | C | C | C | C | C | C | C | C | C | C | C | C | C | C | C | C | C | C | C |   |
| 1.000 | rs4252664  | 35138827 | C | C | C | C | C | C | C | C | C | C | C | C | C | C | C | C | C | C | C |   |
| 1.000 | rs2941518  | 35145896 | C | C | C | C | C | C | C | C | C | C | C | C | T | C | C | C | C | C | C |   |
| 0.170 | rs9896218  | 35147989 | A | A | A | C | C | C | C | A | C | C | C | A | A | A | A | A | A | A | A |   |
| 1.000 | rs9901670  | 35149058 | G | G | G | G | G | G | G | G | G | G | G | G | G | G | G | G | G | G | G |   |
| 1.000 | rs9896940  | 35149501 | A | A | A | A | A | A | A | A | G | G | A | A | A | A | A | A | A | A | A |   |
| 1.000 | rs8192704  | 35152248 | G | G | G | G | G | G | G | G | G | G | G | G | G | G | G | G | G | G | G |   |
| 0.179 | rs9891131  | 35165047 | A | G | A | G | G | G | G | A | G | G | G | G | A | A | A | A | A | A | A |   |
| 0.628 | rs907091   | 35175268 | T | C | C | C | C | C | C | T | C | C | C | C | T | C | C | T | T | T | C |   |
| 1.000 | rs907092   | 35175785 | G | G | A | G | G | G | G | G | G | G | G | G | G | G | G | G | G | G | A |   |
| 1.000 | rs16965328 | 35176217 | T | T | T | T | T | T | T | T | T | T | T | T | T | T | T | T | T | T | T |   |
| 1.000 | rs16965330 | 35176899 | G | G | G | G | G | G | G | G | G | G | G | A | G | G | G | G | G | G | G |   |
| 1.000 | rs9893628  | 35178039 | G | G | G | G | G | G | G | G | G | G | G | G | G | G | G | G | G | G | G |   |
| 1.000 | rs9893933  | 35179419 | G | G | G | G | G | G | G | G | G | G | G | G | G | G | G | G | G | G | G |   |
| 0.170 | rs9894370  | 35179530 | G | C | G | G | C | C | C | G | C | C | C | G | G | G | G | G | G | G | G |   |
| 0.582 | rs9652840  | 35182954 | A | A | A | A | T | A | A | T | A | T | A | A | A | A | A | A | A | A | A |   |
| 1.000 | rs2313429  | 35184185 | A | A | A | A | G | A | A | G | A | G | A | G | A | A | A | A | A | A | A |   |
| 1.000 | rs7503018  | 35184746 | A | A | A | A | G | A | A | G | A | G | A | G | A | A | A | A | A | A | A |   |
| 1.000 | rs9901483  | 35186300 | T | T | T | T | A | T | T | A | T | A | A | T | A | T | T | T | T | T | T |   |
| 1.000 | rs10445308 | 35191573 | C | C | T | C | C | C | C | C | C | C | C | C | C | C | T | C | C | C | T |   |
| 1.000 | rs12945567 | 35194121 | A | A | A | A | T | A | A | A | A | A | A | A | A | A | A | A | A | A | A |   |
| 1.000 | rs1510475  | 35194906 | A | A | A | A | C | A | A | A | A | C | C | A | A | A | A | A | A | A | A |   |
| 1.000 | rs9911634  | 35197257 | C | C | C | C | A | C | C | A | C | A | A | C | A | C | C | C | C | C | C |   |
| 1.000 | rs9911669  | 35197293 | C | C | C | C | G | C | C | C | C | G | G | C | C | C | C | C | C | C | C |   |
| 1.000 | rs9911688  | 35197327 | C | C | C | C | T | C | C | C | C | T | T | C | C | C | C | C | C | C | C |   |
| 1.000 | rs9914516  | 35199651 | C | C | C | C | T | C | C | C | C | T | T | C | C | C | C | C | C | C | C |   |
| 1.000 | rs9913044  | 35199754 | G | G | G | G | A | G | G | A | G | A | A | G | A | G | G | G | G | G | G |   |
| 1.000 | rs12936634 | 35202163 | C | C | C | C | C | C | C | C | C | C | C | C | C | C | C | C | C | C | C |   |

|       |            |          |   |   |   |   |   |   |   |   |   |   |   |   |   |   |   |   |   |   |
|-------|------------|----------|---|---|---|---|---|---|---|---|---|---|---|---|---|---|---|---|---|---|
| 0.211 | rs3803795  | 35202400 | C | T | C | C | T | T | C | C | C | C | C | C | C | C | C | C | C | C |
| 1.000 | rs13313561 | 35207977 | G | G | G | G | C | G | G | C | G | C | C | G | C | G | G | G | G | G |
| 1.000 | rs9899345  | 35208284 | G | G | G | G | A | G | G | A | G | A | A | G | A | G | G | G | G | G |
| 1.000 | rs13313564 | 35209081 | G | G | G | G | A | G | G | G | G | A | A | G | G | G | G | G | G | G |
| 1.000 | rs13313573 | 35209344 | G | G | G | G | T | G | G | G | G | T | T | G | G | G | G | G | G | G |
| 1.000 | rs12937330 | 35210843 | C | C | C | C | A | C | C | A | C | A | A | C | A | C | C | C | C | C |
| 1.000 | rs9941360  | 35213124 | C | C | C | C | T | C | C | C | C | T | T | C | C | C | C | C | C | C |
| 1.000 | rs9941391  | 35215346 | G | G | G | G | T | G | G | G | G | G | G | G | G | G | G | G | G | G |
| 1.000 | RS4795395  | 35216513 | T | T | A | T | T | T | T | T | T | T | T | T | T | T | A | T | T | A |
| 1.000 | rs4337325  | 35217962 | C | C | C | C | T | C | C | T | C | T | T | C | T | C | C | C | C | C |
| 1.000 | rs9909593  | 35223675 | A | A | G | A | A | A | A | A | A | A | A | A | A | A | G | A | A | A |
| 1.000 | rs9898031  | 35226174 | C | C | C | C | G | C | C | C | C | G | G | C | C | C | C | C | C | C |
| 1.000 | rs9913957  | 35228025 | A | A | A | A | G | A | A | A | A | G | G | A | A | A | A | A | A | A |
| 0.141 | rs9303277  | 35229995 | T | T | T | T | T | T | T | T | C | T | T | T | T | C | C | T | C | T |
| 1.000 | rs9904834  | 35230027 | A | A | A | A | G | A | A | A | A | G | G | A | A | A | A | A | A | A |
| 1.000 | rs9911069  | 35230128 | T | T | T | T | C | T | T | T | T | C | C | T | T | T | T | T | T | T |
| 1.000 | rs9908983  | 35230453 | G | G | G | G | A | G | G | G | G | A | A | G | G | G | G | G | G | G |
| 1.000 | rs8076347  | 35231067 | G | G | G | G | T | G | G | T | G | T | T | G | T | G | G | G | G | G |
| 1.000 | rs12942660 | 35235564 | C | C | C | C | T | C | C | T | C | T | T | C | T | C | C | C | C | C |
| 0.582 | rs12946188 | 35237956 | C | C | C | A | A | C | C | C | C | A | A | C | C | C | C | C | C | C |
| 1.000 | rs16965360 | 35238958 | T | T | T | T | T | T | T | C | T | T | T | T | T | T | T | T | T | T |
| 0.141 | rs3816470  | 35239327 | G | G | G | G | G | G | G | G | A | G | G | G | G | A | A | G | A | A |
| 0.582 | rs9913769  | 35239863 | A | A | A | G | G | A | A | A | A | G | G | A | A | A | A | A | A | A |
| 0.582 | rs12945253 | 35244854 | C | C | C | G | G | C | C | C | C | G | G | C | C | C | C | C | C | C |
| 1.000 | rs7215617  | 35245590 | A | A | A | A | A | A | A | T | A | A | A | A | T | A | A | A | A | A |
| 1.000 | rs12948164 | 35247066 | C | C | C | C | C | C | C | C | C | C | C | C | C | C | C | C | C | C |
| 0.582 | rs9900019  | 35248151 | T | T | T | C | C | T | T | T | T | C | C | T | T | T | T | T | T | T |
| 0.628 | rs9908694  | 35251298 | C | C | C | T | T | C | C | T | C | T | T | C | T | C | C | C | C | C |
| 1.000 | rs13341681 | 35256183 | G | G | G | G | G | G | G | G | G | G | G | G | G | G | G | G | G | G |
| 0.582 | rs12939306 | 35262034 | C | C | C | T | T | C | C | C | C | T | T | C | C | C | C | C | C | C |
| 1.000 | rs8069531  | 35262870 | A | A | A | A | A | A | A | T | A | A | A | A | T | A | A | A | A | A |
| 0.582 | rs12950066 | 35262967 | A | A | A | G | G | A | A | A | A | G | G | A | A | A | A | A | A | A |
| 0.582 | rs12947480 | 35263202 | G | G | G | A | A | G | G | G | G | A | A | G | G | G | G | G | G | G |
| 0.582 | rs8079075  | 35264341 | A | A | A | G | G | A | A | A | A | G | G | A | A | A | A | A | A | A |
| 0.582 | rs9900538  | 35265235 | T | T | T | C | C | T | T | T | T | C | C | T | T | T | T | T | T | T |
| 1.000 | rs7212976  | 35265438 | T | T | T | T | T | T | T | G | T | T | T | T | G | T | T | T | T | T |
| 0.582 | rs12943472 | 35265563 | A | A | A | G | G | A | A | A | A | G | G | A | A | A | A | A | A | A |
| 0.628 | rs16965367 | 35267842 | T | T | T | C | C | T | T | C | T | C | C | T | C | T | T | T | T | T |
| 0.582 | rs9915509  | 35268231 | G | G | G | A | A | G | G | G | G | A | A | G | G | G | G | G | G | G |
| 0.582 | rs9916259  | 35268586 | G | G | G | T | T | G | G | G | G | T | T | G | G | G | G | G | G | G |
| 1.000 | rs7220943  | 35269696 | C | C | C | C | C | C | C | T | C | C | C | C | T | C | C | C | C | C |
| 0.628 | rs9899336  | 35271306 | C | C | C | T | T | C | C | T | C | T | T | C | T | C | C | C | C | C |
| 0.582 | rs9907096  | 35272300 | C | C | C | T | T | C | C | C | C | T | T | C | C | C | C | C | C | C |
| 0.582 | rs9907966  | 35272329 | A | A | A | C | C | A | A | A | A | C | C | A | A | A | A | A | A | A |
| 1.000 | rs9635726  | 35273667 | C | C | C | C | C | C | C | C | C | C | C | C | C | C | C | C | C | C |
| 0.582 | rs1453558  | 35275178 | G | A | G | G | G | A | A | G | G | G | G | A | G | G | G | G | G | G |
| 0.628 | rs1453560  | 35276967 | T | T | T | G | G | T | T | G | T | G | G | T | G | T | T | T | T | T |
| 1.000 | rs4795397  | 35277271 | A | A | G | A | A | A | A | A | A | A | A | A | A | A | A | A | A | G |
| 1.000 | rs11557466 | 35278152 | C | C | T | C | C | C | C | C | C | C | C | C | C | C | C | C | C | T |
| 1.000 | rs11078925 | 35278734 | T | T | C | T | T | T | T | T | T | T | T | T | T | T | T | T | T | C |
| 1.000 | rs12150079 | 35278943 | G | G | A | G | G | G | G | G | G | G | G | G | G | G | G | G | G | G |
| 0.582 | rs9916369  | 35281792 | T | T | T | C | C | T | T | T | T | C | C | T | T | T | T | T | T | T |
| 1.000 | rs11557467 | 35282160 | G | G | T | T | T | G | G | G | G | T | T | G | T | G | G | G | G | T |
| 0.057 | rs12936231 | 35282646 | G | G | G | G | G | G | G | C | G | G | G | G | C | C | C | C | C | G |
| 0.628 | rs11870965 | 35283731 | T | T | A | A | A | T | T | T | T | A | A | T | T | T | T | T | T | A |
| 0.628 | rs10852936 | 35285240 | C | C | T | T | T | C | C | C | C | T | T | C | T | C | C | C | C | T |
| 0.628 | rs1054609  | 35286803 | A | A | C | C | C | A | A | A | A | A | C | C | A | A | A | A | A | C |
| 1.000 | rs8073948  | 35287322 | T | T | T | T | A | T | T | T | T | A | A | T | T | T | T | T | T | T |
| 0.628 | rs9907088  | 35288642 | G | G | A | A | A | G | G | G | G | A | A | G | G | G | G | G | G | A |
| 1.000 | rs12232497 | 35293645 | T | T | C | T | T | T | T | T | T | T | T | T | T | T | T | T | T | C |
| 0.628 | rs2872507  | 35294289 | G | G | A | A | A | G | G | G | G | A | A | G | G | G | G | G | G | A |
| 0.650 | rs9901146  | 35296869 | G | G | A | A | A | G | G | A | G | A | A | G | A | G | G | G | G | A |
| 0.650 | rs12950743 | 35302759 | T | T | C | C | C | T | T | C | T | C | C | T | C | T | T | T | T | C |
| 0.650 | rs7359623  | 35303115 | C | C | T | T | T | C | C | T | C | T | T | C | T | C | C | C | C | T |
| 0.582 | rs12943012 | 35303757 | T | T | T | C | C | T | T | T | C | C | T | T | T | T | T | T | T | T |

|       |            |          |   |   |   |   |   |   |   |   |   |   |   |   |   |   |   |   |   |   |   |
|-------|------------|----------|---|---|---|---|---|---|---|---|---|---|---|---|---|---|---|---|---|---|---|
| 0.141 | rs8067378  | 35304874 | G | G | G | G | G | G | G | A | G | G | G | G | A | A | A | A | A | G | G |
| 1.000 | rs8069176  | 35310723 | G | G | A | A | A | G | G | A | G | A | A | G | A | G | G | G | G | A | A |
| 0.582 | rs16965388 | 35315665 | G | A | G | G | G | A | A | G | G | G | G | A | G | G | G | G | G | G | G |
| 1.000 | rs2305480  | 35315722 | G | G | A | G | G | G | G | G | G | G | G | G | G | G | G | G | G | G | A |
| 1.000 | rs2305479  | 35315743 | C | C | T | C | C | C | C | C | C | C | C | C | C | C | C | C | C | C | T |
| 1.000 | rs11078926 | 35316502 | G | G | A | G | G | G | G | G | G | G | G | G | G | G | G | G | G | G | A |
| 1.000 | rs11078927 | 35317931 | C | C | T | C | C | C | C | C | C | C | C | C | C | C | C | C | C | C | T |
| 0.170 | rs2290400  | 35319766 | C | C | C | C | C | C | T | T | C | C | C | T | T | C | T | T | T | T | C |
| 0.628 | rs1008723  | 35319793 | G | G | T | T | T | G | G | G | G | T | T | G | G | G | G | G | G | G | T |
| 1.000 | rs4795400  | 35320546 | C | C | T | C | C | C | C | C | C | C | C | C | C | C | C | C | C | C | T |
| 1.000 | rs869402   | 35321569 | C | C | T | C | C | T | C | C | C | C | C | C | C | C | C | C | C | C | T |
| 0.170 | RS1011082  | 35322040 | G | G | A | A | A | A | A | A | A | A | A | G | C | G | G | G | G | G | A |
| 0.303 | rs7216389  | 35323475 | C | T | C | T | T | C | C | T | T | T | T | T | T | T | T | T | T | T | C |
| 0.370 | RS7216558  | 35323597 | C | C | C | C | T | C | C | T | T | C | C | T | T | C | T | T | T | T | C |
| 0.303 | RS8065777  | 35325928 | C | T | C | T | T | C | C | T | T | T | T | T | T | T | T | T | T | T | C |
| 0.350 | rs9303280  | 35327557 | T | C | C | T | C | T | T | C | C | T | T | C | C | C | C | C | C | C | T |
| 0.170 | rs9303281  | 35327572 | G | G | G | G | A | G | G | G | A | G | G | G | A | A | G | A | A | A | G |
| 0.370 | rs7219923  | 35328044 | C | C | C | C | T | C | C | T | T | C | C | C | T | T | C | T | T | T | C |
| 0.370 | rs7224129  | 35328952 | G | G | G | G | A | G | G | A | A | G | G | G | A | A | G | A | A | A | G |
| 0.628 | rs8076131  | 35334438 | G | A | G | A | A | G | G | A | A | A | A | G | A | A | A | A | A | A | G |
| 0.211 | rs9910635  | 35334690 | G | G | G | G | G | G | G | G | G | G | G | G | A | G | G | A | G | G | A |
| 1.000 | rs12603332 | 35336333 | T | T | C | T | C | T | T | T | C | T | T | T | T | C | T | T | C | C | T |
| 1.000 | rs17608925 | 35336357 | T | T | T | T | T | C | T | T | T | T | T | T | T | T | T | T | T | T | C |
| 1.000 | rs9900885  | 35336577 | A | A | A | A | A | A | A | A | A | A | A | A | A | A | A | A | A | A | A |
| 0.370 | rs3744246  | 35337876 | C | C | C | T | C | T | C | C | C | T | T | C | T | C | T | T | C | C | T |
| 0.087 | rs9894164  | 35338324 | T | T | T | T | T | T | T | T | T | T | T | C | T | C | C | T | T | C | T |
| 1.000 | rs4795402  | 35338911 | C | A | C | A | C | A | C | A | C | A | A | C | A | C | A | A | C | C | A |
| 1.000 | rs4795403  | 35339248 | C | C | C | C | C | T | C | C | C | C | C | C | C | C | C | C | C | C | T |
| 0.370 | rs4795404  | 35339317 | C | C | C | A | C | A | C | C | C | A | A | C | A | C | A | C | C | A | A |
| 0.370 | rs4795405  | 35341943 | C | C | C | T | C | T | C | C | C | T | T | C | T | C | T | C | C | T | T |
| 0.370 | rs4794820  | 35342870 | A | A | G | A | G | A | A | A | G | A | A | A | G | G | A | G | G | G | A |
| 1.000 | rs8065244  | 35344754 | C | C | C | C | C | C | C | G | C | G | G | C | C | C | G | C | C | C | C |
| 1.000 | rs7207600  | 35345186 | G | A | A | A | A | A | G | A | A | A | A | G | A | A | A | A | A | A | A |
| 1.000 | rs8079416  | 35346239 | T | T | C | C | C | C | T | T | C | T | T | T | T | C | T | C | C | C | C |
| 1.000 | rs6503525  | 35348700 | G | G | C | C | C | C | G | G | C | G | G | G | G | C | G | C | C | C | C |
| 1.000 | rs8065126  | 35352561 | T | C | C | C | C | C | T | C | C | C | C | T | C | C | C | C | C | C | C |
| 1.000 | rs4065985  | 35355458 | G | C | C | C | C | C | G | C | C | C | C | G | C | C | C | C | C | C | C |
| 1.000 | rs9905525  | 35358931 | G | G | G | G | G | G | G | G | G | G | G | G | G | G | G | G | G | G | G |
| 1.000 | rs16965456 | 35360621 | T | T | T | T | T | T | T | T | T | T | T | T | T | T | T | T | T | T | T |
| 1.000 | rs4795408  | 35361153 | G | G | A | G | A | A | G | G | A | G | G | G | A | G | A | A | A | G | A |
| 0.211 | rs9895948  | 35361889 | T | T | C | C | C | C | T | C | C | C | C | C | C | C | C | C | C | C | C |
| 0.211 | rs17609240 | 35364215 | T | T | G | G | G | G | T | G | G | G | G | G | G | G | G | G | G | G | G |
| 0.211 | rs8076474  | 35364760 | G | G | C | C | C | C | G | C | C | C | C | C | C | C | C | C | C | C | C |
| 1.000 | rs1007654  | 35364880 | A | G | G | G | G | A | G | G | G | G | A | G | G | G | G | G | G | G | G |
| 1.000 | rs1007655  | 35364945 | G | A | A | A | A | A | G | A | A | A | A | G | A | A | A | A | A | A | A |
| 1.000 | rs2313640  | 35365371 | C | T | T | T | T | T | C | T | T | T | T | C | T | T | T | T | T | T | T |
| 1.000 | rs7218742  | 35367887 | A | G | G | G | G | A | G | G | G | G | A | G | G | G | G | G | G | G | G |
| 0.582 | rs7218321  | 35367995 | C | C | T | T | T | T | C | T | T | T | T | C | T | T | T | T | T | T | T |
| 0.582 | rs7219080  | 35368042 | A | A | C | C | C | C | A | C | C | C | C | A | C | C | C | C | C | C | C |
| 1.000 | rs6503526  | 35368124 | C | C | T | C | T | T | C | C | T | C | C | C | C | T | C | C | T | T | C |
| 0.303 | rs3902025  | 35372780 | G | G | T | G | T | T | G | T | T | T | T | G | T | T | T | T | T | T | T |
| 1.000 | rs3894194  | 35375519 | G | G | A | G | A | A | G | G | A | G | G | G | A | G | G | G | A | G | A |
| 1.000 | rs16965465 | 35375643 | G | G | G | A | G | G | G | A | G | A | A | G | A | G | A | G | G | A | G |
| 1.000 | rs7212938  | 35376206 | T | T | G | T | T | G | T | T | G | T | T | T | T | T | T | T | G | T | G |
| 1.000 | rs3859192  | 35382174 | C | C | T | C | T | T | C | C | T | C | C | C | T | C | T | T | T | C | T |
| 1.000 | rs8077456  | 35382291 | C | G | G | G | G | G | C | G | G | G | G | C | G | G | G | G | G | G | G |
| 1.000 | rs921651   | 35387448 | A | G | A | A | A | A | A | A | A | A | A | A | A | A | A | A | A | A | A |
| 1.000 | rs8075668  | 35391149 | T | T | C | C | C | C | T | T | C | T | T | T | C | T | C | T | C | T | C |
| 0.474 | rs2305481  | 35392150 | G | G | G | G | G | G | G | G | G | G | G | A | G | G | G | G | G | A | G |
| 1.000 | rs11655264 | 35392521 | C | C | G | G | G | G | C | C | G | C | C | C | C | G | C | G | C | G | C |
| 1.000 | rs11655584 | 35392550 | C | T | C | C | C | C | T | T | C | T | T | T | C | C | T | C | C | C | C |
| 1.000 | rs2305482  | 35394453 | C | C | A | A | A | A | C | C | A | C | C | C | A | C | A | C | A | C | A |
| 1.000 | rs9912981  | 35395162 | T | C | C | C | C | C | T | T | C | T | T | T | C | T | C | T | C | C | C |
| 1.000 | rs11078930 | 35395481 | C | C | C | C | C | C | C | C | C | C | C | C | C | C | C | C | C | C | C |
| 1.000 | rs8068498  | 35395647 | T | T | T | T | T | G | T | T | T | T | G | T | T | T | T | T | T | T | T |



|       |            |          |   |   |   |   |   |   |   |   |   |   |   |   |   |   |   |   |   |   |   |
|-------|------------|----------|---|---|---|---|---|---|---|---|---|---|---|---|---|---|---|---|---|---|---|
| 1.000 | rs3859188  | 35396504 | C | C | C | C | C | C | T | T | C | T | T | T | C | C | T | C | C | C | C |
| 1.000 | rs4795411  | 35396908 | A | A | A | G | A | A | A | A | A | A | A | A | A | A | A | A | A | A | A |
| 1.000 | rs4065321  | 35397074 | T | T | C | C | C | C | T | T | C | T | T | T | T | C | T | C | T | C | T |
| 1.000 | rs9913561  | 35398593 | G | G | G | G | G | G | G | G | G | G | G | G | G | G | G | G | G | G | G |
| 1.000 | rs9915252  | 35398614 | G | G | C | C | C | C | G | G | C | G | G | G | G | C | G | C | G | C | G |
| 1.000 | rs9916279  | 35399680 | T | T | T | T | T | T | C | C | T | C | C | C | T | T | C | T | T | T | T |
| 1.000 | rs8066582  | 35400455 | C | C | T | T | T | T | C | C | T | C | C | C | C | T | C | T | C | T | C |
| 1.000 | rs8080546  | 35400492 | C | C | C | C | C | C | C | C | C | A | A | C | C | C | A | C | C | C | C |
| 1.000 | rs11652139 | 35402559 | A | A | A | G | A | A | A | A | A | A | A | A | A | A | A | A | A | A | A |
| 1.000 | rs11658328 | 35402762 | C | C | T | T | T | T | C | C | T | C | C | C | C | T | C | T | C | T | C |
| 1.000 | rs8073254  | 35402876 | G | G | C | C | C | C | G | G | C | G | G | G | G | C | G | C | G | C | G |
| 1.000 | rs3826330  | 35403762 | T | T | T | C | T | T | T | T | T | T | T | T | T | T | T | T | T | T | T |
| 1.000 | rs2241245  | 35404540 | T | T | C | C | C | C | T | T | C | T | T | T | T | T | C | T | C | T | C |
| 1.000 | rs9899302  | 35405612 | G | G | G | G | G | G | G | C | G | G | G | G | G | G | G | G | G | G | G |
| 1.000 | rs12453334 | 35406999 | C | C | C | C | T | C | C | C | C | C | C | C | C | C | C | C | C | C | C |
| 1.000 | rs2012     | 35407610 | G | G | G | G | G | G | C | C | G | C | C | C | G | G | C | G | G | G | G |
| 0.656 | rs4794822  | 35410238 | C | C | T | C | T | T | C | C | T | C | C | C | T | T | C | T | C | T | T |
| 1.000 | rs8068076  | 35411096 | G | G | G | G | G | G | A | A | G | A | A | A | G | G | A | G | G | G | G |
| 1.000 | rs9748108  | 35412757 | G | G | G | G | G | G | G | G | G | G | G | G | G | G | G | G | G | G | G |
| 1.000 | rs8070454  | 35414280 | C | C | T | C | T | T | C | C | T | C | C | C | C | T | C | T | C | T | C |
| 1.000 | rs11652972 | 35415443 | G | G | G | G | G | G | T | G | G | G | G | G | G | G | G | G | G | G | G |
| 1.000 | rs6503531  | 35416009 | T | T | T | C | T | T | T | T | T | T | T | T | T | T | T | T | T | T | T |
| 1.000 | rs7211771  | 35419310 | C | C | C | C | C | C | T | C | C | C | C | T | C | C | C | C | C | C | C |
| 1.000 | rs8078723  | 35420405 | T | T | C | T | C | C | T | T | C | T | T | T | T | C | T | C | T | C | T |
| 1.000 | rs7224260  | 35422139 | C | C | C | C | C | C | C | C | C | T | T | C | C | C | T | C | C | C | C |
| 1.000 | rs11655821 | 35423220 | C | C | C | C | C | C | T | C | C | C | C | T | C | C | C | C | C | C | C |
| 1.000 | rs2227319  | 35424371 | G | A | G | G | G | G | G | G | G | G | G | G | G | G | G | G | G | G | G |
| 1.000 | rs2227320  | 35424790 | G | T | G | G | G | G | G | G | G | G | G | G | G | G | G | G | G | G | G |
| 1.000 | rs2227321  | 35424820 | G | G | G | G | G | G | G | G | G | G | G | G | G | G | G | G | G | G | G |
| 1.000 | rs2227322  | 35425194 | C | C | G | C | G | G | C | C | G | C | C | C | C | G | C | G | C | G | C |
| 1.000 | rs2071369  | 35425831 | C | C | C | T | C | C | C | C | C | C | C | C | C | C | C | C | C | C | C |
| 1.000 | rs2227327  | 35425939 | G | C | G | G | G | G | G | G | G | G | G | G | G | G | G | G | G | G | G |
| 1.000 | rs2227328  | 35425968 | G | A | G | G | G | G | G | G | G | G | G | G | G | G | G | G | G | G | G |
| 1.000 | rs2071370  | 35425978 | C | C | C | T | C | C | C | C | C | C | C | C | C | C | C | C | C | C | C |
| 1.000 | rs5820317  | 35426499 | G | G | G | C | G | G | G | G | G | G | G | G | G | G | G | G | G | G | G |
| 1.000 | rs2227329  | 35426583 | C | C | C | C | C | C | A | C | C | C | C | C | C | C | C | C | C | C | C |
| 1.000 | rs2227330  | 35426634 | G | G | G | G | G | G | G | G | G | G | G | G | G | G | G | G | G | G | G |
| 1.000 | rs25645    | 35426669 | G | G | G | G | G | G | G | G | G | G | G | G | G | G | G | G | G | G | G |
| 1.000 | rs2827     | 35427263 | C | C | C | C | C | C | T | T | C | T | T | T | C | C | T | C | C | C | C |
| 1.000 | rs1042657  | 35427318 | T | T | T | C | T | T | T | T | T | T | T | T | T | T | T | T | T | T | T |
| 1.000 | rs1042658  | 35427428 | C | C | T | C | T | T | C | C | T | C | C | C | C | T | C | T | C | T | C |
| 1.000 | rs2227334  | 35427735 | C | C | C | C | C | C | C | C | C | C | C | C | C | C | C | C | C | C | C |
| 1.000 | rs1045929  | 35428952 | C | C | T | C | T | T | C | C | T | C | C | C | C | T | C | T | C | T | C |
| 1.000 | rs12309    | 35428988 | C | C | C | C | C | C | C | C | C | C | C | C | C | C | C | C | C | C | C |
| 1.000 | rs709592   | 35429079 | C | C | T | C | T | T | C | C | T | C | C | C | C | T | C | T | C | T | C |
| 1.000 | rs709591   | 35429087 | T | T | A | T | A | A | T | T | A | T | T | T | T | A | T | A | T | A | T |
| 1.000 | rs16965540 | 35429557 | T | T | T | T | T | T | T | T | T | T | T | T | T | T | T | T | T | T | T |
| 1.000 | rs2270401  | 35429782 | A | A | A | A | A | A | A | A | A | A | A | A | A | A | A | A | A | A | A |
| 1.000 | rs9913632  | 35430958 | C | C | C | C | C | C | C | C | C | C | C | C | C | C | C | C | C | C | C |
| 1.000 | rs2302776  | 35431675 | A | G | A | G | A | A | G | G | A | A | A | A | G | A | A | A | G | A | G |
| 1.000 | rs3213762  | 35432153 | A | A | G | A | G | G | A | A | G | A | A | A | A | G | A | G | A | G | A |
| 1.000 | rs9891598  | 35432319 | G | G | G | G | G | G | G | A | G | G | G | G | G | G | G | G | G | G | G |
| 1.000 | rs12451897 | 35432801 | G | G | G | G | G | G | G | G | G | G | G | G | G | G | G | G | G | G | G |
| 1.000 | rs2302777  | 35433018 | A | A | A | A | A | A | A | A | A | A | A | A | A | A | A | A | A | A | A |
| 1.000 | rs9915684  | 35435550 | G | G | G | G | G | G | A | G | A | G | G | G | G | G | G | G | G | G | G |
| 1.000 | rs7503939  | 35435607 | G | A | A | A | A | A | A | A | A | A | A | A | A | A | A | A | A | A | A |
| 1.000 | rs9916158  | 35435755 | G | G | G | G | G | G | G | T | G | G | G | G | G | G | G | G | G | G | G |
| 1.000 | rs2302775  | 35436370 | C | C | T | C | T | T | C | C | T | C | C | C | C | T | C | T | C | T | C |
| 1.000 | rs2302774  | 35436616 | G | G | G | G | G | G | G | G | G | G | G | G | G | G | G | G | G | G | G |
| 1.000 | rs7501734  | 35441453 | A | A | A | A | A | A | A | A | A | A | A | A | A | A | A | A | A | A | A |
| 1.000 | rs7502514  | 35442370 | G | G | A | A | A | A | G | G | A | G | G | G | A | A | G | A | G | A | A |
| 0.650 | rs3935280  | 35442581 | G | G | A | A | A | A | G | G | A | G | G | G | A | A | G | A | A | A | A |
| 0.650 | rs6503534  | 35445450 | G | G | A | A | A | A | G | G | A | G | G | G | A | A | G | A | A | A | A |
| 1.000 | rs3934886  | 35449021 | A | G | A | A | A | A | A | A | A | G | G | A | A | A | G | A | A | A | A |
| 1.000 | rs9895610  | 35449561 | T | T | T | A | T | T | A | A | T | T | T | A | A | T | T | T | T | A | T |

|       |            |          |   |   |   |   |   |   |   |   |   |   |   |   |   |   |   |   |   |   |
|-------|------------|----------|---|---|---|---|---|---|---|---|---|---|---|---|---|---|---|---|---|---|
| 1.000 | rs11078936 | 35451440 | T | T | T | T | T | T | T | T | T | T | T | T | T | T | T | T | T | T |
| 1.000 | rs9907437  | 35454826 | T | T | T | T | T | T | C | T | T | T | T | T | T | T | T | T | T | T |
| 1.000 | rs11078937 | 35462079 | G | G | G | G | G | A | A | G | G | G | A | G | G | G | G | G | G | G |
| 1.000 | rs8082130  | 35462417 | G | G | G | G | G | A | A | G | G | G | A | G | G | G | G | G | G | G |
| 0.656 | rs8065443  | 35462466 | G | G | A | G | A | A | G | G | A | G | G | A | A | G | A | G | A | A |
| 0.656 | rs868150   | 35466885 | G | G | A | G | A | A | G | G | A | G | G | A | A | G | A | G | A | A |
| 0.370 | rs7502966  | 35470048 | C | T | T | T | T | C | C | T | T | T | T | C | T | T | C | C | C | C |
| 1.000 | rs1568400  | 35474634 | T | C | C | C | T | C | C | C | T | C | C | C | T | C | C | C | T | C |
| 1.000 | rs8078399  | 35478024 | G | T | G | T | G | G | G | G | G | G | G | T | G | G | G | G | G | T |
| 1.000 | rs9893741  | 35478938 | G | C | C | G | G | C | G | C | G | G | G | C | C | G | G | C | G | G |
| 1.000 | rs1879265  | 35484902 | G | A | G | G | A | G | A | A | A | G | G | G | A | A | G | G | A | A |
| 1.000 | rs939348   | 35485379 | C | C | C | T | T | C | C | C | C | C | C | C | T | C | C | C | T | C |
| 1.000 | rs2230701  | 35493742 | C | C | C | C | C | C | C | C | C | C | C | C | C | C | C | C | C | C |
| 1.000 | rs8075021  | 35494287 | C | C | C | C | C | C | C | C | C | C | C | C | C | C | C | C | C | C |
| 1.000 | rs12939700 | 35499317 | C | C | C | C | C | A | C | A | C | C | C | C | C | C | A | C | C | C |
| 0.628 | rs3744805  | 35501880 | C | C | C | T | C | C | C | C | C | T | T | C | C | T | C | C | T | C |
| 0.628 | rs2314339  | 35506738 | C | C | C | T | C | C | C | C | C | T | T | C | C | T | C | C | T | C |
| 1.000 | rs9905506  | 35506995 | G | G | G | G | G | G | A | G | G | G | G | G | G | G | G | G | G | A |
| 1.000 | rs2071427  | 35508018 | T | T | C | C | T | T | T | T | T | T | T | C | T | T | C | T | T | T |
| 1.000 | rs2269457  | 35508215 | C | C | T | T | T | T | C | C | C | T | C | T | C | T | T | C | C | C |
| 1.000 | rs9894283  | 35508575 | C | C | C | C | C | C | C | T | C | C | C | C | C | C | C | C | C | T |
| 0.650 | rs12941497 | 35509120 | A | A | G | A | G | A | A | G | A | A | A | G | A | G | A | A | A | G |
| 0.350 | rs939347   | 35510219 | A | G | G | A | G | A | G | G | A | A | G | G | G | G | A | A | G | G |
| 0.303 | rs2071570  | 35510616 | A | C | C | A | C | A | C | C | C | A | C | C | C | C | A | C | C | C |
| 0.350 | rs16965644 | 35517723 | G | G | G | A | A | A | G | A | A | G | G | A | G | A | A | A | A | A |
| 1.000 | rs9898129  | 35519475 | A | T | A | A | A | A | T | A | A | T | T | A | T | A | A | A | A | A |
| 1.000 | rs9890574  | 35525853 | A | T | A | A | T | A | T | T | T | T | T | A | T | A | T | T | A | T |
| 1.000 | rs9897340  | 35526403 | A | A | A | A | A | A | A | A | A | A | A | A | A | A | A | A | A | A |
| 1.000 | rs9903261  | 35530994 | A | C | A | A | A | A | C | A | A | A | C | A | C | A | A | A | A | A |
| 1.000 | rs9906274  | 35535107 | C | C | C | C | C | C | G | C | C | C | G | C | C | C | C | C | C | C |
| 1.000 | rs2030380  | 35535232 | T | T | T | T | T | T | T | T | C | T | T | T | T | T | T | T | T | T |
| 1.000 | rs2030379  | 35535660 | T | T | T | T | T | T | T | T | C | T | T | T | T | T | T | T | T | T |
| 1.000 | rs9900154  | 35536725 | T | C | T | T | T | T | C | T | T | T | C | T | C | T | T | T | C | T |
| 0.628 | rs7211770  | 35542529 | A | G | A | A | G | A | G | G | G | G | G | A | G | G | G | G | A | G |
| 1.000 | rs10512482 | 35542587 | A | T | A | A | A | A | T | A | A | A | T | A | T | A | A | A | T | A |
| 1.000 | rs16965660 | 35545347 | C | T | C | C | C | C | T | C | C | C | T | C | T | C | C | C | C | C |
| 1.000 | rs7212098  | 35551463 | C | C | C | C | C | C | C | C | C | C | C | C | C | C | C | C | C | C |
| 1.000 | rs9910546  | 35555665 | T | T | T | T | T | T | G | T | T | T | G | T | T | T | T | T | T | T |
| 1.000 | rs16965669 | 35557882 | C | A | C | C | C | C | A | C | C | C | A | C | A | C | C | C | A | C |
| 1.000 | rs9898500  | 35558907 | G | A | G | G | G | G | A | G | G | G | A | G | A | G | G | G | G | G |
| 1.000 | rs7206995  | 35559891 | G | G | G | G | G | G | A | G | G | G | A | G | A | G | G | G | G | G |
| 1.000 | rs9910373  | 35561768 | A | G | A | A | A | A | G | A | A | A | G | A | G | A | A | A | G | A |
| 1.000 | rs9909777  | 35561869 | C | T | C | C | C | C | T | C | C | C | T | C | T | C | C | C | T | C |
| 1.000 | rs3923166  | 35570302 | A | A | A | A | A | A | A | A | A | A | A | A | A | A | A | A | A | A |
| 1.000 | rs9896339  | 35576112 | A | A | A | A | A | A | T | A | A | A | T | A | T | A | A | A | A | A |
| 1.000 | rs9909548  | 35579348 | G | G | G | G | G | G | C | G | G | G | C | G | C | G | G | G | G | G |
| 1.000 | rs9909811  | 35579469 | G | C | G | G | G | G | C | G | G | G | C | G | C | G | G | G | G | G |
| 1.000 | rs9894807  | 35583704 | T | G | T | T | T | T | G | T | T | T | G | T | G | T | T | T | G | T |
| 1.000 | rs9911936  | 35586558 | A | A | A | A | A | A | G | A | A | A | G | A | G | A | A | A | A | A |
| 1.000 | rs2280400  | 35602653 | G | G | G | G | G | G | A | G | G | G | A | G | A | G | G | G | G | G |
| 1.000 | rs4254375  | 35604085 | G | G | G | G | G | G | G | G | G | G | G | G | G | G | G | G | G | G |
| 0.650 | rs3744806  | 35605152 | G | C | C | C | G | C | G | G | G | C | G | C | G | C | G | G | C | G |
| 1.000 | rs9907683  | 35612427 | A | A | A | A | A | A | C | A | A | A | C | A | C | A | A | A | A | A |
| 0.650 | rs8073925  | 35613046 | C | G | G | G | C | G | C | C | C | G | C | G | C | G | C | C | G | C |
| 1.000 | rs9901109  | 35633374 | T | T | T | T | T | T | G | T | T | T | G | T | G | T | T | T | T | T |
| 1.000 | rs6503539  | 35636451 | T | T | C | C | T | C | T | T | T | C | T | C | T | C | T | T | T | T |
| 1.000 | rs9908034  | 35640001 | T | T | T | T | T | T | C | T | T | T | C | T | C | T | T | T | T | T |
| 1.000 | rs16965687 | 35641044 | T | T | T | T | T | T | C | T | T | T | C | T | C | T | T | T | T | T |
| 1.000 | rs9916782  | 35641566 | A | A | A | A | A | A | G | A | A | A | G | A | G | A | A | A | A | A |
| 0.650 | rs8066144  | 35641717 | C | T | T | T | C | T | C | C | C | T | C | T | C | T | C | C | T | C |
| 1.000 | rs8076915  | 35645052 | A | G | G | G | A | G | G | A | A | G | G | G | G | A | A | A | G | A |
| 1.000 | rs9904021  | 35652756 | G | G | G | G | G | T | G | G | G | T | G | T | G | G | G | G | G | G |
| 1.000 | rs8072718  | 35653135 | A | G | G | G | A | G | G | A | A | G | G | G | G | A | A | A | G | A |
| 1.000 | rs12936565 | 35658563 | C | T | T | T | C | T | T | C | C | T | T | T | T | C | C | C | T | C |
| 1.000 | rs16965691 | 35663449 | C | C | C | C | C | C | C | C | C | G | C | C | C | C | C | C | C | C |

|       |            |          |   |   |   |   |   |   |   |   |   |   |   |   |   |   |   |   |   |   |   |
|-------|------------|----------|---|---|---|---|---|---|---|---|---|---|---|---|---|---|---|---|---|---|---|
| 1.000 | rs11078940 | 35663590 | C | C | C | C | C | C | T | C | C | C | T | C | T | C | C | C | C | C | C |
| 1.000 | rs4566234  | 35667875 | G | G | G | G | G | G | T | G | G | G | T | G | T | G | G | G | G | G | G |
| 1.000 | rs4077125  | 35677005 | G | G | G | G | G | G | A | G | G | G | A | G | A | G | G | G | G | G | G |
| 1.000 | rs9916460  | 35681591 | T | T | T | T | T | T | C | T | T | C | T | C | T | T | T | T | T | T | T |
| 1.000 | rs9908257  | 35681648 | G | G | G | G | G | G | A | G | G | G | A | G | A | G | G | G | G | G | G |
| 1.000 | rs9899406  | 35699959 | C | C | C | C | C | C | C | C | C | C | C | C | C | C | C | C | C | C | C |
| 0.650 | rs2077464  | 35700090 | G | A | A | A | G | A | G | G | G | A | G | A | G | A | G | G | A | G | G |
| 1.000 | rs1130199  | 35701095 | C | T | T | T | C | T | T | C | C | T | T | T | T | T | C | C | C | T | C |
| 1.000 | rs4135011  | 35703425 | C | C | C | C | C | C | C | C | C | C | C | C | C | C | C | C | C | C | C |
| 1.000 | rs4135013  | 35703787 | C | T | C | C | C | C | C | C | C | C | C | C | C | C | C | C | C | C | C |
| 1.000 | rs4135014  | 35704314 | T | T | T | T | A | T | T | T | T | T | T | T | T | T | T | T | T | A | T |
| 1.000 | rs4135025  | 35708682 | G | T | G | G | G | G | G | G | G | G | G | G | G | G | G | G | G | G | G |
| 0.650 | rs13706    | 35710677 | A | G | G | G | A | G | A | A | A | G | A | G | A | G | A | A | A | G | A |
| 1.000 | rs9895942  | 35713623 | G | G | G | G | G | A | G | G | G | G | G | G | G | G | G | G | G | G | G |
| 0.650 | rs2120200  | 35713901 | G | A | A | A | G | A | G | G | G | A | G | A | G | A | G | G | A | G | G |
| 1.000 | rs9892367  | 35716914 | A | G | G | G | A | G | G | A | A | G | G | G | G | A | A | A | G | A | A |
| 1.000 | rs7222102  | 35718876 | G | G | G | G | G | G | G | G | G | G | G | G | G | G | G | G | G | G | G |
| 1.000 | rs7217852  | 35723547 | G | G | A | A | G | A | G | G | G | A | G | A | G | A | G | G | A | G | G |
| 1.000 | rs9904270  | 35733357 | C | C | C | C | C | C | T | C | C | C | T | C | T | C | C | C | C | C | C |
| 0.650 | rs12946680 | 35734183 | G | C | C | C | G | C | G | G | G | C | G | C | G | C | G | G | C | G | G |
| 1.000 | rs8065665  | 35735789 | C | A | A | A | C | A | A | C | C | A | A | A | A | A | C | C | C | A | C |

**Table S6.** Top 100 genes (known) associated with the rs12936231 SNP, from publically available datasets from Sanger et al. (Population genomics of human gene expression, *Nature Genetics* 39, 1217-1224, 2007) and from Kwan et al. (Genome-wide analysis of transcript isoform variation in humans, *Nature Genetics* 40, 225-231, 2008).

**Top 100 genes associated with rs12936231**

| <b>Sanger CEU</b> | <b>Sanger YRI</b> | <b>Kwan CEU</b> |
|-------------------|-------------------|-----------------|
| ORMDL3            | ORMDL3            | GSDML           |
| LOC338949         | PEX26             | RHOD            |
| LOC283010         | KCNAB1            | OR2L2           |
| CECR1             | LOC400964         | ORMDL3          |
| LOC401109         | LOC377094         | DKFZP564O0823   |
| LOC375118         | ETV6              | P4HA2           |
| RFXAP             | ELAVL3            | ACADVL          |
| AP1G2             | SUPT3H            | SHF             |
| FLJ32844          | CASPR3            | C22orf37        |
| KCNJ1             | ALS2CR7           | CLIP2           |
| ATM               | STK38L            | RBPJ            |
| SLC11A1           | GPR52             | RAB27B          |
| FLJ14082          | RGPR              | C8orf46         |
| LOC403313         | LOC401945         | IL12RB2         |
| ACY-3             | LOC257407         | PYCARD          |
| CIZ1              | CLCN5             | ASCL4           |
| STXBP2            | LMO7              | KRTAP4-2        |
| KIAA1836          | KIAA1596          | ASTL            |
| PDC               | SEMA5B            | TFCP2L1         |
| LOC388832         | PROSC             | F9              |
| LOC339065         | LOC387736         | PTTG3           |
| ARTN              | F8                | ALS2CR13        |
| MGC17791          | LOC345525         | SCG5            |
| BTG4              | LOC375819         | KCNMB4          |
| DNAJC6            | MGC1136           | ABCC4           |
| C11ORF4           | DECR2             | LOC200383       |
| GALNT8            | DEFB125           | CXCL14          |
| DAB2IP            | LOC399904         | KIAA1505        |
| LOC151242         | LOC342619         | C21orf62        |
| KRTAP3-3          | ANKRD2            | MRPS26          |
| GJE1              | HGFAC             | FAM26C          |
| SPTBN1            | KIAA0828          | MGC4294         |
| GNAI2             | FLJ14297          | KRTAP1-1        |
| FLJ23306          | THAP11            | TFEC            |
| DCTN1             | LOC388957         | RRAS2           |
| LOC400154         | RANBP2L1          | TCEAL6          |
| HIST1H2BK         | LOC402630         | PLEKHA7         |
| BAT1              | C14orf143         | TMEM24          |
| FLJ23360          | LOC129870         | LYZ             |

|           |           |           |
|-----------|-----------|-----------|
| SIAT7E    | FGA       | SH3PXD2A  |
| LOC390325 | PPP1R13B  | CCDC23    |
| CNGA1     | DDX31     | ROBO1     |
| CD8A      | CCNDBP1   | SMAD2     |
| SLC22A1   | NOTCH2    | RASAL1    |
| LOC400852 | LOC286333 | ARL11     |
| LOC375521 | LOC387833 | GRM5      |
| CBFA2T3   | MGC3207   | GPA33     |
| PRO0659   | TOB3      | FBXO36    |
| KIAA1985  | QSCN6     | NUMBL     |
| DPP8      | KRT18     | GRASP     |
| LOC389015 | SOX12     | PTHLH     |
| SMARCD1   | MYADM     | PTTG1IP   |
| LOC387836 | LSM8      | POU6F2    |
| LOC346399 | LOC388334 | CAMK2G    |
| RGS14     | ZSWIM2    | TNFSF14   |
| LOC401627 | PAMCI     | SERPINB11 |
| KCNJ3     | ZNF319    | CKM       |
| HYPC      | PNLIPRP2  | TMEM185B  |
| NR2E3     | HSPD1     | PRM3      |
| FLJ23614  | WNT2B     | CTNNA1    |
| SCRG1     | HSPA12B   | RAB27A    |
| MDS1      | DUSP15    | TIGD6     |
| TM6SF1    | AMPD2     | SHC4      |
| LOC284938 | FCRH3     | C8orf77   |
| LOC389334 | LOC285401 | PHLDB3    |
| LOC387904 | HOXD1     | ENPP5     |
| EZH1      | CLASP2    | CMYA5     |
| LOC375092 | SMAP1     | GRLF1     |
| FLJ40542  | ABCC11    | ACY3      |
| LOC63920  | ALDH3A2   | TJP3      |
| CACH-1    | CCR8      | NCOA6     |
| C17orf31  | LOC374833 | LOC645261 |
| LOC400958 | RPH3AL    | KATNB1    |
| H2BFS     | LOC285118 | ARHGAP24  |
| FLJ22390  | LOC377625 | TNNT3     |
| LOC402577 | LOC219954 | PHACS     |
| FLJ45778  | SCNN1A    | ARHGEF4   |
| SLC29A4   | DT1P1A10  | TAF1      |
| MFRP      | EAF1      | ZNF77     |
| HHL       | NIP30     | KIRREL2   |
| UPP2      | RBL2      | RDH5      |
| MS4A2     | LOC283385 | ATP8B2    |
| GPR6      | NALP6     | SERPINB10 |
| DYRK2     | PCDHGB7   | EYA1      |
| LOC375672 | LOC339738 | HAS3      |

|           |              |          |
|-----------|--------------|----------|
| LOC377839 | SLC25A20     | TMEM134  |
| DPP6      | LOC376401    | P2RX7    |
| LOC345970 | TMPRSS6      | MGC40574 |
| OPCML     | LOC342132    | FAM5C    |
| AKNA      | CX3CR1       | DPYD     |
| LOC375509 | DKFZP564D172 | FLJ46020 |
| LOC402592 | LZIC         | FLJ45530 |
| HIST1H2AK | C10orf26     | NR4A1    |
| TGM1      | GGN          | SMARCA4  |
| FOX11     | LOC256280    | ZNF33A   |
| GPRC5D    | ANK3         | C17orf58 |
| SLC22A1   | A1BG         | HLA-DRA  |
| GP2       | VPS41        | C8orf16  |
| ANKRD1    | MT4          | FLJ32214 |
| LOC152485 | SEPHS2       | DUSP5P   |

**Table S7.** Information for SNPs that were heterozygous in at least two resequenced samples.  $r^2$  value for each SNP with rs12936231 is given.

| SNP        | chr | location | Genic location | CEU     |         |       |                    | YRI     |         |       |                    | Genomic context of failed assay |
|------------|-----|----------|----------------|---------|---------|-------|--------------------|---------|---------|-------|--------------------|---------------------------------|
|            |     |          |                | NA07056 | NA07345 | $r^2$ | AE P value (GSDMB) | NA18858 | NA18871 | $r^2$ | AE P value (GSDMB) |                                 |
| RS2952144  | 17  | 35213543 | IKZF3          | htz     | htz     | £     |                    | htz     |         | *     |                    | SINE repeat                     |
| RS4795395  | 17  | 35216513 | IKZF3          | htz     | htz     | 0.800 | 3.01E-12           |         | htz     | 0.036 | 1.000              |                                 |
| RS56380902 | 17  | 35319898 | GSDMB          | htz     | htz     | £     |                    |         | htz     | 0.321 | 0.003              |                                 |
| RS1011082  | 17  | 35322040 | GSDMB          | htz     | htz     | 1.000 | 1.09E-18           |         | htz     | 0.237 | 0.004              |                                 |
| RS921650   | 17  | 35322602 | GSDMB          | htz     |         | £     |                    |         | htz     | 0.121 | 0.071              |                                 |
| RS921649   | 17  | 35322800 | GSDMB          | htz     | htz     | £     |                    |         | htz     | *     |                    | SINE repeat                     |
| RS7216558  | 17  | 35323597 | GSDMB          | htz     | htz     | 1.000 | 1.09E-18           | htz     | htz     | 0.402 | 7.96E-05           |                                 |
| RS7221605  | 17  | 35324315 | GSDMB          | htz     |         | £     |                    |         | htz     | *     |                    | SINE repeat                     |
| RS1031458  | 17  | 35325699 | GSDMB          | htz     | htz     | £     |                    |         | htz     | 0.132 | 0.243              |                                 |
| RS8065777  | 17  | 35325928 | GSDMB          | htz     | htz     | 0.895 | 3.60E-17           |         | htz     | 0.142 | 0.243              |                                 |
| RS9303279  | 17  | 35327494 | GSDMB          | htz     | htz     | 0.800 | 3.01E-12           |         | htz     | £     |                    |                                 |
| RS3902920  | 17  | 35328542 | intergenic     | htz     | htz     | £     |                    | htz     | htz     | 0.102 | 0.120              |                                 |
| RS8074437  | 17  | 35329663 | intergenic     | htz     | htz     | £     |                    | htz     | htz     | 0.294 | 2.75E-04           |                                 |

£ Sequenom assay failed for these SNPs

\* Sequenom genotyping and Sanger sequencing failed for these SNPs

htz: resequenced individual predicted to be heterozygous for that SNP
